# Supplementary material for: Ruthenium-Arene Complexes with Bis(pyrazol-1-yl)methane Ligands: Structural, DFT Analysis, and Cytotoxicity Studies
Source: Research Square preprint supplement (doi:10.21203/rs.3.rs-8388864/v1), 2025-12-23
Supplement: Supplementary file 1 [file 074bf27090c0e6cd12bbdf3d.docx]

# Ruthenium-Arene Complexes with Bis(pyrazol-1-yl)methane Ligands: Structural, DFT Analysis, and Cytotoxicity Studies

Amos K. Kanyora[a]*, Athi Welsh [b], Peter Ongoma[a]*, Josiah O. Omolo[a],Joel Gichumbi[c], Allen Mambanda[d], Sharon Prince[e], Gregory S. Smith [b], Reinner O. Omondi [b][f]*

[a] Department of Chemistry, Egerton University, P.O Box 536-20115, Egerton, Kenya.

[b] Department of Chemistry, University of Cape Town, Rondebosch 7701, South Africa

[c] Department of Physical Sciences, Chuka University, P.O. Box 109-60400, Chuka, Kenya.

[d] School of Chemistry and Physics, University of KwaZulu-Natal, Private Bag X01, Scottsville, Pietermaritzburg 3209, South Africa.

[e] Department of Human Biology, University of Cape Town, Faculty of Health Science, Observatory 7925, South Africa

[f] Department of Medicinal Chemistry, University of Kansas, Lawrence, 66045, USA

Amos K. Kanyora ([kimem.aka12@gmail.com](mailto:kimem.aka12@gmail.com))*, Athi Welsh ([WLSATH001@myuct.ac.za](mailto:WLSATH001@myuct.ac.za)), Peter Ongoma ([ongoma@yahoo.com](mailto:ongoma@yahoo.com))*, Josiah O. Omolo ([jomolo@egerton.ac.ke](mailto:jomolo@egerton.ac.ke)),Joel Gichumbi ([jsmwangi2009@gmail.com](mailto:jsmwangi2009@gmail.com)), Allen Mambanda ([mambandaallen@gmail.com](mailto:mambandaallen@gmail.com)), Sharon Prince ([sharon.prince@uct.ac.za](mailto:sharon.prince@uct.ac.za)), Gregory S. Smith ([gregory.smith@uct.ac.za](mailto:gregory.smith@uct.ac.za)), Reinner O. Omondi ([reinnerochola587@gmail.com](mailto:reinnerochola587@gmail.com))

## Abstract

A series of four η⁶-arene ruthenium(II) half-sandwich complexes (**RuL1-RuL4**) with bis(pyrazol-1-yl)methane ligands (dpzm, bdmpzm) were synthesized and characterized by FTIR, NMR, ESI-MS, elemental analysis, and single-crystal X-ray diffraction. The structures confirmed robust piano-stool geometries, with subtle effects of arene identity (*p*-cymene *vs.* toluene) and pyrazole methylation on Ru–N bond distances and chelate angles. DFT calculations (B3LYP/6-31G**//LanL2DZ) reproduced crystallographic metrics within ≤2.7% and revealed consistently large HOMO–LUMO gaps (3.97–4.07 eV), indicating high electronic hardness. Methylated complexes showed slightly reduced gaps, yet all remained electronically inert. Cytotoxicity assays across nine cancer cell lines (breast, cervical, pancreatic, rhabdomyosarcoma) at concentrations of 20 μM revealed weak antiproliferative activity (cell viability ≥ 100%), in sharp contrast to related Ru(II) scaffolds. The poor activity correlates with wide band gaps, electronic inertness, and steric shielding that limit ligand exchange and charge-transfer processes. These results underscore the importance of ligand design in tuning biological activity: incorporating π-acceptor or labile functionalities could reduce ΔE, enhance MLCT pathways, and unlock the anticancer potential of this scaffold.

**Keywords:** crystal structures, Density Functional Theory (DFT), arene-ruthenium(II) complexes, bis(pyrazol-1-yl)methane, cytotoxicity

## Introduction

The search for alternative metal-based anticancer agents has increasingly turned to ruthenium complexes due to their diverse oxidation states, versatile coordination chemistry, and distinct mechanisms of action compared with platinum drugs [1-6]. Unlike Pt(II)-based agents, which primarily target DNA, ruthenium complexes exhibit non-conventional pathways of antiproliferative activity, providing unique opportunities in rational drug design [7-10]. Several candidates have progressed to preclinical and clinical evaluation, underscoring their therapeutic promise [5,11-13].

Clinically relevant examples include the Ru(III) complexes KP1019, KP1339, and NAMI-A, belonging to the RAPTA (Ru–arene–phosphine) family. These compounds demonstrated encouraging anticancer and antimetastatic activity with reduced systemic toxicity compared to platinum analogues [13-16]. Their activity has been attributed in part to the biological resemblance of Ru(III) to Fe(III), which enables interaction with transferrin and albumin, facilitating selective delivery [17]. *In vivo*, these species are believed to function as prodrugs, undergoing thiol-mediated reduction to active Ru(II) forms [18-22]. Despite promising preclinical profiles, challenges such as poor solubility and low therapeutic index hindered their progression beyond Phase I trials [20].

To overcome these limitations, attention has shifted to η⁶-arene Ru(II) complexes, which display enhanced stability and lipophilicity and allow fine-tuning of steric and electronic properties through ligand design [23-25]. Their biological activity has been linked not only to DNA interactions but also to protein binding and enzyme modulation [26-32]. Numerous half-sandwich Ru(II) complexes bearing N,Nʹ-donor ligands have shown significant cytotoxicity and activity against cisplatin-resistant cell lines [33-38]. For instance, hydrazinyl-thiazolo Ru(II) complexes modulated p53 signaling to induce apoptosis in ovarian cancer cells, while arene–thiosemicarbazone complexes exhibited potent activity against both primary and metastatic ovarian models [25,39]. These studies highlight the critical role of ligand architecture in dictating stability, reactivity, and biological outcome.

Bis(pyrazol-1-yl)methane (dpzm) ligands are particularly attractive scaffolds owing to their tunable donor properties and established pharmacological activities, including antioxidant, anti-inflammatory, antimicrobial, and anticancer effects [40-46]. Substituent variation on the pyrazole rings or methylene bridge allows precise modulation of steric and electronic factors, offering opportunities for tailoring ruthenium complexes with improved pharmacological potential. Recent reports suggest that Ru(II)–dpzm complexes can induce apoptosis-mediated cell death, but their structural features and reactivity remain underexplored [32].

In this study, we synthesized and characterized a series of half-sandwich η⁶-arene Ru(II) complexes containing dpzm and bdpzm ligands with either toluene or *p*-cymene as spectator arenes and are provided in **Scheme 1**. Their molecular structures were determined by single-crystal X-ray diffraction, and their electronic properties were examined through Density Functional Theory (DFT) calculations. Cytotoxic activity was evaluated against a panel of cancer cell lines, including cervical (CaSki, HeLa), breast (MCF-7, T-47D, MDA-MB-231), pancreatic (CFPAC-1, PANC-1), and rhabdomyosarcoma (RH-30, RD). By systematically combining experimental and computational approaches, this work provides new insights into how dpzm-derived ligands influence the geometry, electronic stability, and cytotoxic profile of η⁶-arene Ru(II) complexes.


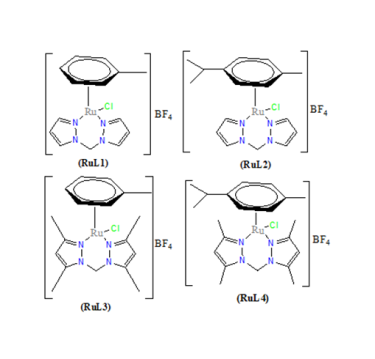


**Scheme 1**: Structures of the studied Ru(II) bis(pyrazol-1-yl)methane complexes (**RuL1-C7**, **RuL2-C1**, **RuL3-C6** and **RuL4-C2**).

## Experimental Section

### Synthetic Procedure for Complexes

Bis(pyrazol-1-yl)methane ligands were synthesised as previously described [47]. The arene complexes **RuL1 - RuL4**, with the general formula [Ru(N^N’)(η⁶-arene)Cl]BF₄, where N^N’ = bis(pyrazol-1-yl)methane (dpzm) or bis(3,5-dimethylpyrazol-1-yl)methane (bdmpzm), and η⁶-arene = *p*-cymene (cym) or toluene (tol), were prepared according to the literature procedures (**Scheme 2**) [48]. A solution of 1 mmol (612 mg for cymene dimer; 528 mg for toluene dimer) of the dinuclear precursor [(η⁶-arene)RuCl(μ-Cl)]₂ was mixed with 2.2 mmol of the bidentate ligand in dry acetonitrile (~10 mL) under a nitrogen atmosphere at 25 °C for 4 hours. The reaction mixture was concentrated under reduced pressure, and a cold ethanolic solution (5 mL) of NH₄BF₄ (2.5 mmol) was slowly added to precipitate the complexes. After cooling in an ice bath for 1 hour, the resulting orange/yellow crystalline products were filtered, washed with cold diethyl ether, and dried under vacuum. Single crystals suitable for X-ray diffraction were obtained by slow vapour diffusion (1–2 weeks) of diethyl ether into methanol solutions of the complexes. Yields were typically between 40 and 84.1%.


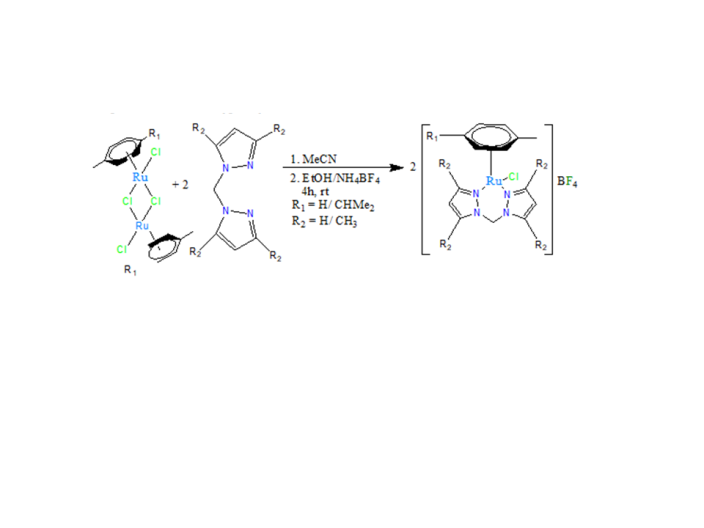


**Scheme 2.** Synthetic route for[(cym/tol)dpzm/bdmpzm)Ru(Cl)]BF4 complexes, **RuL1** (R = CH3, R1 = H) **RuL2; (**R = H, R1 = CHMe2); **RuL3** (R = H, R1 = CHMe2) and **RuL4** (R = CH3, R1 = CHMe2).

### Characterization of Complexes

1H and 13C NMR spectra were recorded on a Bruker Avance DPX 500 MHZ spectrometer equipped with a 5 mm sample probe at 30 °C (Bruker BioSpin GmbH, Rheinstetten, Germany) operating at frequencies of 500 MHz for 1H and 100 MHz for 13C, respectively. All chemical shifts (δ) for protons or carbons are reported in parts per million (ppm) relative to tetramethylsilane (SiMe4). Peak multiplicities are abbreviated: singlet (s), doublet (d), triplet (t), quartet (q), and multiplet (m). Mass spectral data for the ligands and complexes were obtained using an LC Premier micro-mass spectrometer.

FT-IR spectra of complexes were recorded in the 3800–600 cm−1 range on an Agilent Technologies Cary 630 spectrometer (Vienna, Austria). Elemental analyses (C, H, and N) for complexes **RuL1-RuL4** were performed using a Thermo Scientific Flash 2000 Spectrometer. The full characterization data are given in the Supporting Information (SI1 - 15).

Single-crystal X-ray diffraction data of **RuL1-RuL4** were collected using a Bruker APEX Duo CCD area detector diffractometer [49] fitted with an Incoatec micro source operating at 30 W. The crystals were maintained at a constant temperature within the range of 100–104 K during data collection using an Oxford Instruments Cryojet accessory (Oxford, UK). Diffraction was performed using graphite-monochromated Cu *K*α radiation (λ = 1.54178 Å), with a crystal-to-detector distance of 50 mm. Data were collected using ω-/φ-scans, 30 W X-ray power and 0.50o frame widths, and a 2θ range in the range 6.98–142.948° using SAINTS’ APEX2 [50]. Crystal structures were solved using the OLEX2 program [51], with the SHELXT structure solution program [52] employing Intrinsic Phasing, and refined using SHELXL. All non-hydrogen atoms were refined anisotropically via full-matrix least-squares minimisation/refinement on *F*2. Hydrogen atoms were included in the model but not refined. Crystallographic visualization was performed in Mercury v.4.3 (Cambridge Crystallographic Data Centre, Cambridge, UK). A summary of the data collection and refinement parameters is provided in Tables 1and 2. Intramolecular contacts for complex **RuL4** are listed in Table S1.

### Computational Analysis

To gain deeper insights into the structural and electronic properties of the η⁶-arene ruthenium(II) complexes, computational modeling was carried out. The ground-state geometries of complexes **RuL1-RuL4** were optimized using Density Functional Theory (DFT) as implemented in the Gaussian 09 software suite [53]. The B3LYP (Becke, 3-parameter, with Lee-Yang-Parr) method [54,55], in combination with the LANL2DZ basis sets, was employed to optimize the geometries of the complexes. All calculations were carried out in methanol, using the conductor-like polarizable continuum model (C-PCM) to simulate solvation effects [56,57]. The calculations assumed a singlet spin ground state and a total charge of +2. The optimized geometries are summarised in Table 3, while key computed parameters—including HOMO and LUMO energies, NBO atomic charges, selected bond lengths and other relevant electronic descriptors—are provided in Tables 4 and 5.

### Cell Culture and Cytotoxicity Assay

The breast cancer cell lines, MCF-7 (estrogen-receptor positive), T-47D, and MDA-MB-231 (triple-negative); as well as cervical cancer subtypes (Caski and HeLa), pancreatic cancer subtypes (CFPAC-1 and PANC-1), and rhabdomyosarcoma cancer subtypes (RH-30 and RD) were cultured in the Roswell Park Memorial Institute (RPMI) 1640 medium (Sigma Aldrich, USA) and Dulbecco’s Modified Eagle Medium (DMEM) (Sigma Aldrich, USA), respectively. All media were supplemented with 10% heat-inactivated foetal bovine serum (FBS), 100 μg/mL streptomycin, and 100 μg/mL penicillin. To maintain physiological pH and temperature, the cells were incubated in a 5% CO2 atmosphere at 37°C. Additionally, the culture media were replaced with fresh media every 48 to 72 hours.

The cytotoxic effects of the η⁶-arene Ru(II) complexes (**RuL2**–**RuL1**) were assessed *in vitro* against nine cancer cell line subtypes. Cells were seeded in 96-well plates at the following densities per well: MCF-7, T-47D, Caski, and HeLa (4,500 cells); MDA-MB-231 (3,000 cells); CFPAC (10,000 cells); PANC-1 (8,000 cells); and RD and RH30 (6,500 cells each). The cells were allowed to adhere under standard physiological conditions using either RPMI or DMEM growth media for 24 hours (Caski, HeLa, RD, RH30, CFPAC, and PANC-1) or 48 hours (MCF-7, MDA-MB-231, and T-47D), depending on the cell line.

Once the cells reached approximately 50–60% confluence, they were treated for 48 hours with either 0.1% DMSO (vehicle control) or 20 μM of each test complex (**RuL1**– **RuL4**) prepared in 0.1% DMSO. Cell viability and proliferation were evaluated using the MTT assay, following the method developed by Mosmann [58]. This colorimetric assay is based on the NAD(P)H-dependent reduction of MTT by cellular oxidoreductase enzymes, producing purple formazan crystals in metabolically active cells [59]. Following incubation with the MTT reagent, the absorbance of the resulting formazan was measured at 600 nm using a pre-calibrated GloMax® Explorer Multimode Microplate Reader GM3500 (Promega). Absorbance values were corrected by subtracting the blank readings obtained from the corresponding media (RPMI and DMEM) used for each cell line [60]. Each compound was tested in quadruplicate wells, and the entire experiment was conducted in triplicate to ensure reproducibility. The mean percentage cell viability for each treatment group was normalized to the vehicle control, which was set as 100% viability.

## Results and Discussion

The η⁶-arene ruthenium(II) complexes were characterized using FTIR, NMR (¹H and ¹³C), ESI-MS, elemental analysis, and single-crystal X-ray diffraction. These complementary techniques confirmed the molecular structures, coordination environments, and solution stability of the complexes.

The ¹H and ¹³C NMR spectra (Figures S1–S8 and Table S1) showed all expected resonances for the coordinated η⁶-arene (*p*-cymene or toluene) and the N,N′-chelating bis(pyrazol-1-yl)methane ligands, consistent with a single species in solution. A diagnostic feature was the methylene bridge (–CH₂–) of the bis(pyrazolyl)methane ligands, which exhibited clear diastereotopism. In the dpzm- and bdmpzm-based complexes (**RuL2** and **RuL1**), the methylene protons appeared as AB spin systems at δ 6.25–7.08 ppm, while in **RuL3** and **RuL4** (substituted bdmpzm) they appeared as AX systems at δ 5.84–6.34 ppm, confirming restricted rotation and a rigid chelating environment around Ru(II). Similar methylene diastereotopy has been observed in η⁶-arene Ru(II) complexes containing bis(pyrazol-1-yl)methane ligands, where chelation locks the CH₂ bridge in a rigid geometry [42,61].

The aromatic region also provided useful structural information. Complexes **RuL1** and **RuL2** exhibited three distinct pyrazolyl resonances between δ 6.63–8.22 ppm, while **RuL3** and **RuL4** displayed a single, well-resolved set at δ 6.26–7.00 ppm. The bdmpzm methyl substituents appeared as sharp singlets at δ 2.48 ppm in **RuL3** and **RuL4**, in agreement with their symmetric environment. The η⁶-arene protons were observed as multiplets in the δ 5.91–6.18 ppm range for the toluene derivatives and δ 6.00–6.18 ppm for the cymene analogues, both appearing as typical AA′BB′ spin systems of centrosymmetric arene–ruthenium complexes [62,63]. Comparable arene resonance patterns have been reported in other half-sandwich Ru(II) systems bearing pyrazolyl or imidazolyl ligands, confirming that such features are diagnostic of the piano-stool geometry [64].

The 13C NMR spectra corroborated these findings, with methylene and arene carbons signals aligning with values reported for related Ru(II) η⁶-arene complexes [65]. These trends indicate that substitution on the bis(pyrazolyl) backbone (dpzm → bdmpzm) induces only minor electronic perturbations at the Ru center, similar to those observed in other Ru(II) arene–heteroscorpionate systems [66].

The FTIR spectra (Figures S9–S11) exhibited characteristic absorptions consistent with coordination of the bis(pyrazol-1-yl)methane ligands. Two ν(C–H) stretching bands were observed at ~3133 and 2950 cm⁻¹, attributable to aromatic and aliphatic moieties, respectively. A band in the 1516–1559 cm⁻¹ region was assigned to the ν(C=N) stretch of the coordinated pyrazolyl groups, while absorptions between 1200–1422 cm⁻¹ corresponded to ν(C=C) vibrations within the heteroaromatic rings [47].

In addition, a sharp absorption band near 1030 cm⁻¹ (**RuL1** and **RuL3**) and ~1050 cm⁻¹ (**RuL2** and **RuL4**) was attributed to the vibronic ν(B–F) stretch of the tetrafluoroborate (BF₄⁻) counterion, confirming its retention in the isolated complexes. The absence of extraneous bands in the carbonyl region supported the purity of the compounds, while the diagnostic ν(C=N) shifts relative to the free ligands indicated successful coordination through the pyrazolyl donors.
**These ν(C=N) shifts are comparable to those reported for other Ru(II)–pyrazolyl complexes, reflecting similar electron withdrawal upon metal coordination [42,64].**

ESI-MS provided further confirmation of the proposed molecular formulas. The spectra revealed distinct molecular ion peaks with isotopic distributions characteristic of ruthenium (Figures S12–S15). The most intense signals corresponded to the [M + H]⁺ species for each complex: m/z 377 (**RuL1**), 419 (**RuL2**), 433 (**RuL3**), and 475 (**RuL4**), all in excellent agreement with calculated values. The observed isotopic envelopes closely matched theoretical Ru isotope patterns, reinforcing the elemental analysis results**. Minimal fragmentation under ionization, as observed here, has also been reported for similar Ru(II) arene–pyrazolyl species, highlighting the stability of the Ru–N coordination [64]**.

Overall, the combined spectroscopic and analytical results confirm the successful formation of η⁶-arene Ru(II) half-sandwich complexes with bis(pyrazol-1-yl)methane ligands. **The observed NMR, FTIR, and MS profiles show strong parallels with those reported for structurally related η⁶-arene Ru(II) scaffolds [64,66,67]** suggesting that the dpzm/bdmpzm substitution primarily tunes steric and electronic effects without altering the core piano-stool geometry. Such ligand-dependent modulation has been correlated with subtle changes in redox and biological behavior in comparable complexes, as noted in recent reports.

Single-crystal X-ray diffraction confirmed the molecular structures of **RuL1**–**RuL4** (Figures 1–4), and crystallographic parameters are summarized in Tables 1 and 2. In all cases, the Ru(II) center adopts the expected distorted octahedral “piano-stool” geometry, comprising an η⁶-arene, a bidentate bis(pyrazol-1-yl)methane ligand, and a terminal chloride donor.


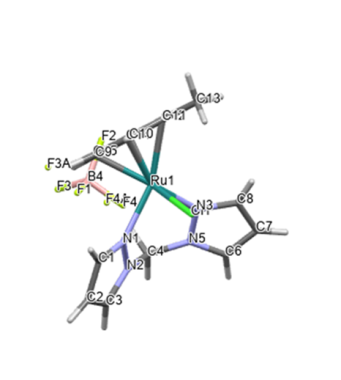


**Figure 1: RuL1**-toluene and unsubstituted N,N’ bidentate ligand complex


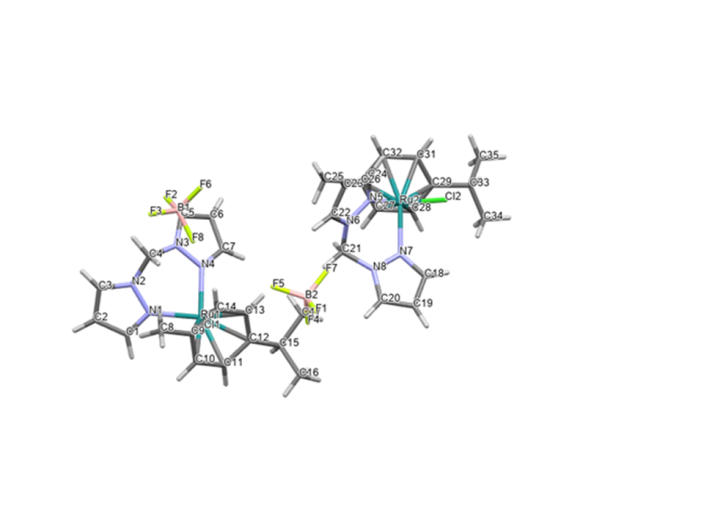


**Figure 2: RuL2**-*p*-cymene complex with methyl substituted N,N’ bidentate ligand


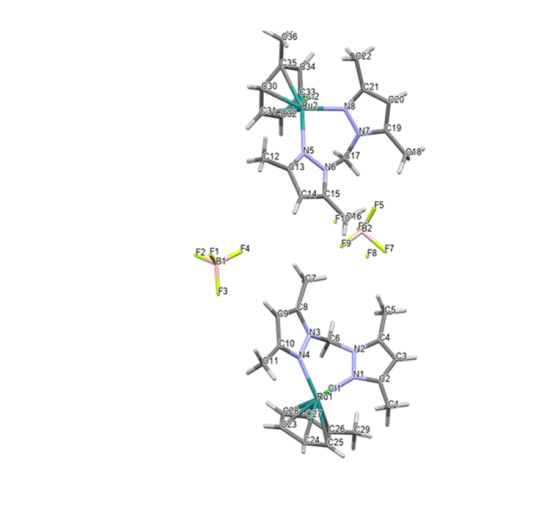


**Figure 3: RuL3**- toluene complex with methyl substituted N,N’ bidentate ligand


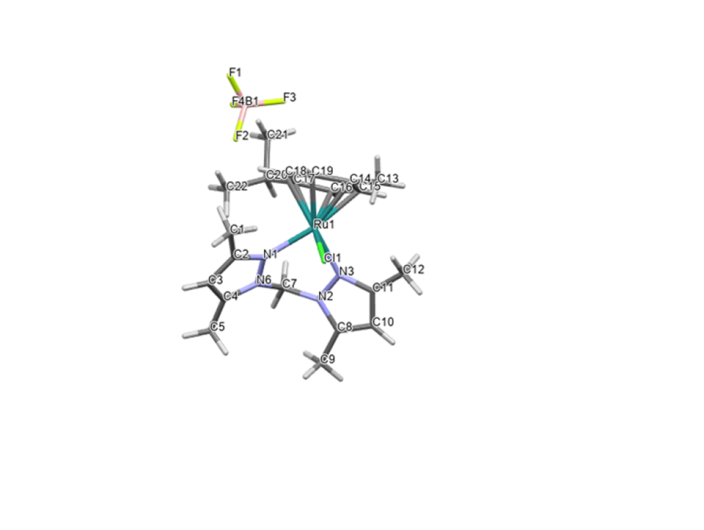


**Figure 4: RuL4**- *p*-cymene complex with methyl substituted N,N’ bidentate ligand

**Table 1:** Crystallographic data and structure refinement parameters for the complexes.

|  | RuL1 |  | RuL2 | RuL3 | RuL4 |  |
| --- | --- | --- | --- | --- | --- | --- |
| Empirical formula | C14H16BClF4N4Ru |  | C34H44B2Cl2F8N8Ru2 | C36H48B2Cl2F8N8Ru2 | C21H30BClF4N4Ru |  |
| Color | Yellow |  | Orange | Orange | Orange |  |
| Formula weight | 463.64 |  | 1011.43 | 1039.48 | 561.82 |  |
| Temperature/K | 103.17 |  | 99.95 | 100.01 | 102.36 |  |
| Crystal system | monoclinic |  | triclinic | triclinic | monoclinic |  |
| Space group | P21/c |  | P-1 | P-1 | P21/n |  |
| a/Å | 7.0627(2) |  | 9.9969(2) | 13.0289(2) | 9.7370(3) |  |
| b/Å | 19.5075(5) |  | 13.8338(3) | 13.8249(2) | 24.5694(7) |  |
| c/Å | 12.0646(3) |  | 14.2960(3) | 14.0532(2) | 9.9199(3) |  |
| α/° | 90 |  | 87.5770(10) | 109.4400(10) | 90 |  |
| β/° | 96.6580(10) |  | 89.5590(10) | 115.09 | 99.0130(10) |  |
| γ/° | 90 |  | 85.0700(10) | 100.26 | 90 |  |
| Volume/Å3 | 1651.00(8) |  | 1967.98(7) | 2004.98(5) | 2343.86(12) |  |
| Z | 4 |  | 2 | 2 | 4 |  |
| ρcalcg/cm3 | 1.865 |  | 1.707 | 1.722 | 1.592 |  |
| μ/mm‑1 | 9.627 |  | 8.132 | 8 | 6.89 |  |
| F(000) | 920 |  | 1016 | 1048 | 1144 |  |
| Crystal size/mm3 | 0.215 × 0.075 × 0.04 |  | 0.23 × 0.17 × 0.125 | 0.335 × 0.205 × 0.205 | 0.125 × 0.105 × 0.06 |  |
| Radiation (CuKα (λ)) | 1.54178 |  | 1.54178 | 1.5417 | 1.54178 |  |
| 2Θ range for data collection/° | 8.66 to 136.284 |  | 6.188 to 134.354 | 7.31 to 143.952 | 7.196 to 136.53 |  |
| Index ranges | -7 ≤ h ≤ 7, -23 ≤ k ≤ 23, -14 ≤ l ≤ 14 |  | -11 ≤ h ≤ 11, -16 ≤ k ≤ 16, -17 ≤ l ≤ 17 | -15 ≤ h ≤ 15, -16 ≤ k ≤ 16, -16 ≤ l ≤ 15 | -9 ≤ h ≤ 11, -29 ≤ k ≤ 29, -11 ≤ l ≤ 11 |  |
| Reflections collected | 23923 |  | 56434 | 49369 | 32378 |  |
| Independent reflections | 2934 [Rint = 0.0253, Rsigma = 0.0142] |  | 6893 [Rint = 0.0271, Rsigma = 0.0141] | 7309 [Rint = 0.0260, Rsigma = 0.0151] | 4179 [Rint = 0.0302, Rsigma = 0.0165] |  |
| Data/restraints/parameters | 2934/0/247 |  | 6893/0/511 | 7309/0/553 | 4179/0/296 |  |
| Goodness-of-fit on F2 | 1.061 |  | 1.162 | 1.133 | 1.042 |  |
| Final R indexes [I≥2σ (I)] | R1 = 0.0161, wR2 = 0.0411 |  | R1 = 0.0199, wR2 = 0.0491 | R1 = 0.0238, wR2 = 0.0593 | R1 = 0.0182, wR2 = 0.0448 |  |
| Final R indexes [all data] | R1 = 0.0166, wR2 = 0.0415 |  | R1 = 0.0202, wR2 = 0.0494 | R1 = 0.0240, wR2 = 0.0595 | R1 = 0.0190, wR2 = 0.0452 |  |
| Largest diff.  peak/hole / e Å-3 | 0.31/-0.32 |  | 0.26/-0.61 | 0.48/-0.96 | 0.29/-0.38 |  |

**Table 2:** Comparative bond lengths and angles of half-sandwich η⁶-arene Ru(II) complexes

| Complex | Ru–N (Å) | Ru–Cl (Å) | N–Ru–N / bite angle (°) | N–Ru–Cl (°) |  |
| --- | --- | --- | --- | --- | --- |
| RuL1 (toluene, non-Me) | 2.088–2.099 | 2.4089 | 85.72 | 85.10 | Slightly shorter Ru–N; toluene less steric |
| RuL2 (cymene, non-Me) | 2.097–2.104 | 2.4016 | 84.40 | 86.90 | Shorter Ru–N; less distortion |
| RuL3 (toluene, Me) | 2.119–2.127 | 2.3904–2.4066 | 85.98–86.87 | 84.88 | Methylation lengthens Ru–N, minor angular shifts |
| RuL4 (cymene, Me) | 2.112–2.127 | 2.4013 | 87.68 | 84.56 | Methylation elongates Ru–N, widens bite angle |

Comparative structural analysis reveals subtle but systematic effects of arene identity and methyl substitution on the Ru–N coordination environment. In both the toluene and *p*-cymene series, methyl substitution on the ligand leads to slightly longer Ru–N bonds (2.112–2.127 Å in **RuL3**–**RuL4**) relative to their non-methylated analogues (2.088–2.104 Å in **RuL1**–**RuL2**), accompanied by small increases in the N–Ru–N bite angle. These values are consistent with those typically reported for η⁶-arene Ru(II) half-sandwich complexes **(Ru–N = 2.08–2.13 Å, Ru–Cl = 2.38–2.41 Å** [13,68]. **Similar ligand-induced variations in bond lengths and bite angles have been noted in related Ru(II)–bis(pyrazolyl) and heteroscorpionate systems, where steric and electronic effects subtly tune metal–ligand interactions [61,64].**

The Ru–Cl distances (2.39–2.41 Å) remain effectively constant across the series, indicating that arene and ligand substitution primarily modulate the chelate domain rather than the monodentate site. **This observation aligns with prior crystallographic studies showing that Ru–Cl bond rigidity contributes to kinetic stability in half-sandwich complexes [66].**

Crystal packing is reinforced by weak C–H···Cl and C–H···π contacts (2.7–2.9 Å), comparable to those found in other η⁶-arene Ru(II) salts [65,69]. Such interactions enhance lattice stability without perturbing the primary coordination geometry (Figure S16 and Table S2).

Overall, these results confirm that both arene identity and methyl substitution induce predictable but modest geometric adjustments, consistent with **structure–property correlations observed in similar Ru(II) arene systems** and likely relevant to the complexes’ electronic and biological behavior.

### Density Functional Theory (DFT) Calculations

Density Functional Theory (DFT) calculations were undertaken to complement and rationalize the experimental findings. The geometry-optimized structures of **RuL1**–**RuL4** at the B3LYP/LANL2DZ level reproduced the crystallographic parameters closely, with Ru–N and Ru–Cl bond length deviations below 0.03 Å and bite angle differences within 1°. This strong agreement confirms that both arene type and methyl substitution exert only subtle, predictable influences on the coordination geometry (Table 3).

Methyl substitution led to slightly longer Ru–N bonds and smaller HOMO–LUMO gaps (3.12–3.36 eV), suggesting increased electron donation from the ligand and enhanced metal–ligand back-donation (Table 4). These trends parallel experimental observations and align with previous reports on η⁶-arene Ru(II) and pyrazolyl complexes, where small electronic perturbations fine-tune reactivity and redox potential without compromising structural integrity [61,64].

Frontier molecular orbital (FMO) analysis revealed that the HOMO is primarily localized on the Ru–arene fragment, while the LUMO is mainly ligand-centered, indicating mixed metal-to-ligand charge transfer (MLCT) character. This orbital distribution is typical of half-sandwich Ru(II) complexes [68,69] and mirrors findings in other bioactive N,N′-chelating Ru(II) scaffolds [66,67]. Such MLCT features are significant for DNA or protein binding, where charge delocalization facilitates π–π stacking and electron-transfer processes.

Overall, **the DFT results corroborate the crystallographic and spectroscopic data**, confirming that ligand and arene substitutions subtly modulate the electronic distribution without altering the core piano-stool structure. This delicate balance of geometric stability and electronic tenability also observed in analogous Ru(II) arene systems—provides valuable insights into their potential chemical reactivity and biological performance.

**Table 3:** Overlays of the geometry-optimized structures on their crystal structures, and HOMO and LUMO electron density mappings for **RuL1**-**RuL4**.


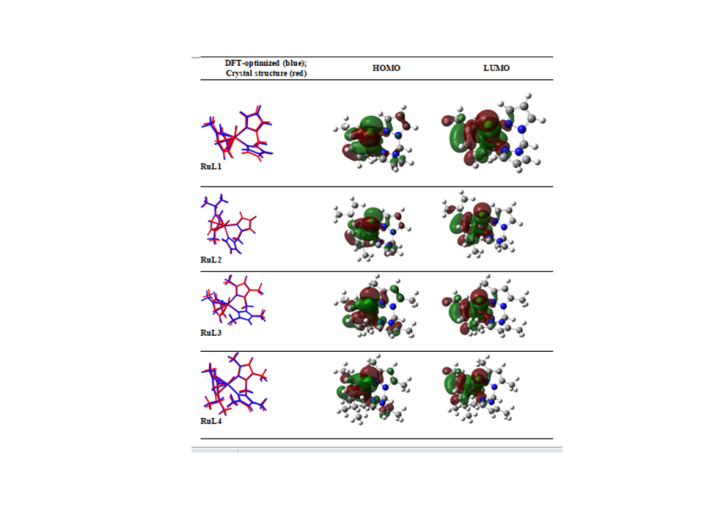


**Table 4**: Summary of DFT calculated data for the optimized complexes.

| Parameter | RuL1 | RuL2 | RuL3 | RuL4 |
| --- | --- | --- | --- | --- |
| HOMO-LUMO energy/eV |  |  |  |  |
| - (LUMO), eV | 2.420 | 2.330 | 2.403 | 2.338 |
| -(HOMO), eV | 6.468 | 6.398 | 6.374 | 6.330 |
| Band gap, ΔE, eV | 4.048 | 4.068 | 3.971 | 3.992 |
| Global electrochemical parameters | | | | |
| Chemical hardness (*η*) | 2.024 | 2.034 | 1.986 | 1.996 |
| Chemical potential (*μ*) | −4.444 | −4.364 | −4.389 | -4.334 |
| Chemical softness (*σ*) | 0.494 | 0.492 | 0.504 | 0.501 |
| Electronegativity (*χ*) | 4.444 | 4.364 | 4.389 | 4.334 |
| Electrophilicity index (*ω*) | 4.879 | 4.681 | 4.850 | 4.705 |
| Nucleophilicity (ε) | 0.205 | 0.214 | 0.206 | 0.213 |
| Dipole moments | 7.0519 | 7.8202 | 6.8039 | 6.6336 |
| (NBO) charge |  |  |  |  |
| Ru | −0.046 | -0.032 | −0.035 | -0.019 |
| Cl | −0.289 | −0.299 | −0.303 | -0.312 |
| N1 | −0.235 | −0.237 | −0.256 | -0.253 |
| N3 | −0.232 | −0.235 | −0.215 | -0.257 |

The DFT-predicted geometries are in excellent agreement with the crystallographic measurements, validating the computational model (Table 5). Across the series, methyl-substituted complexes exhibit slightly elongated Ru–N bonds (by ~0.02–0.03 Å) relative to their unsubstituted analogues, reflecting a modest weakening of the donor environment. In contrast, Ru–Cl bond lengths remain essentially invariant (2.39–2.41 Å), underscoring the negligible influence of substitution on trans influence at the metal center. The N–Ru–N bite angles (83–88°) are largely dictated by the chelate geometry of the bis(pyrazol-1-yl)methane ligand and show only minor electronic contributions.

Overall, the congruence between experimental and theoretical results supports the reliability of the B3LYP/6-31G**//LanL2DZ level of theory for describing half-sandwich ruthenium complexes. Importantly, the subtle bond length variations observed here are consistent with recent integrative crystallographic–DFT studies on η⁶-arene Ru(II) scaffolds, which attribute such effects to a combination of steric congestion and modest electronic redistribution rather than to fundamental changes in coordination mode [70].

**Table 5:** Comparison of selected DFT data metrics with those from the crystal structures for complexes

|  | RuL1 |  |  |  | RuL2 | | | RuL3 | | | RuL4 |  |  | |  |
| --- | --- | --- | --- | --- | --- | --- | --- | --- | --- | --- | --- | --- | --- | --- | --- |
| Bond lengths | Theoret | Cryst. | %RE |  | Theoret. | Cryst. | Theoret. | Cryst | %RE | %RE | Theoret. | | | Cryst. | | %RE |  |
| Ru-‡ Cl | 2.468 | 2.4088 | 2.5 |  | 2.4468 | 2.4015 | 2.4598 | 2.4012 | 2.4 | 1.9 | 2.4541 | | | 2.3905 | | 2.7 |  |
| Ru-Ccentroid | 1.864 | 1.673 | 11.4 |  | 1.850 | 1.676 | 1.860 | 1.688 | 10.2 | 10.4 | 1.873 | | | 1.676 | | 11.8 |  |
| Ru-N1 | 2.0826 | 2.0983 | 0.7 |  | 2.0915 | 2.1037 | 2.0952 | 2.112 | 0.8 | 0.6 | 2.1025 | | | 2.1206 | | 0.9 |  |
| Ru-N3 | 2.0853 | 2.0878 | 0.1 |  | 2.0848 | 2.0975 | 2.1075 | 2.1270 | 0.9 | 0.6 | 2.0937 | | | 2.1192 | | 1.2 |  |

Theoret. = DFT-calculated data; Cryst = crystal data taken as the accurate data; % relative error (RE) = {(DFT Theoret. – Cryst)/Cryst} × 100.

### **Cytotoxicity Evaluation of Complexes against Various Cancer Subtypes**

The antiproliferative activities of the ruthenium(II) complexes (**RuL1**–**RuL4**) were evaluated against a diverse panel of human cancer cell lines, including cervical (Caski, HeLa), breast (MCF-7, T-47D, MDA-MB-231), pancreatic (CFPAC-1, PANC-1), and rhabdomyosarcoma (RH-30, RD), using the MTT assay after 48 h exposure. At 20 µM, all complexes displayed limited cytotoxicity, with cell viability generally exceeding 90% across all subtypes, indicating low antiproliferative activity (Figures 5–8, Table S3). For instance, in MCF-7 cells, **RuL1**–**RuL4** maintained viability between 94–97%, whereas cisplatin (CDDP) reduced viability to approximately 52%. Similar trends were observed in T-47D, MDA-MB-231, and Caski cells (90–96% viability *vs*. 35–65% for CDDP). Notably, pancreatic cancer cells (CFPAC-1, PANC-1) even exhibited apparent proliferation (104–125% viability), further confirming the lack of growth inhibition.

The low antiproliferative response of **RuL1**–**RuL4** contrasts markedly with the stronger activities reported for structurally related η⁶-arene Ru(II) complexes containing bis(pyrazol-1-yl)methane (bpzm) or analogous ligands. In this study, all four complexes retained cell viabilities above 88% at 20 μM across nine human cancer cell lines, indicating estimated IC₅₀ values exceeding 100 μM. By comparison, **Matveevskaya *et al*. (2021)** [66] reported that [Ru(η⁶-*p*-cymene)(bis(pyrazol-1-yl)methane)Cl]Cl exhibited **IC₅₀ = 47.3 ± 0.8 μM** in MCF-7 breast cancer cells, while cisplatin in the same study showed **IC₅₀ = 33.7 ± 1.8 μM**, confirming the higher potency of the reference drug. Similarly, **Montani *et al.* (2016) [42]** demonstrated that a methyl-substituted bpzm complex, [Ru(η⁶-*p*-cymene)(bis(3,5-dimethylpyrazol-1-yl)methane)Cl]Cl (UNICAM-1), induced significant tumour growth suppression in triple-negative breast cancer models, consistent with low micromolar *in vitro* activity. More recently, **Pereira *et al.* (2023) [13]** and **Allison *et al.* (2023) [71]** reported families of arene–Ru(II) derivatives, including RAPTA-like and ferrocene-substituted analogues, with **IC₅₀ values ranging from 1.8 to 15 μM** against breast cancer subtypes such as MCF-7 and MDA-MB-231. These comparative data indicate that **RuL1**–**RuL4** are **less cytotoxic** than many reported η⁶-arene ruthenium(II) complexes.


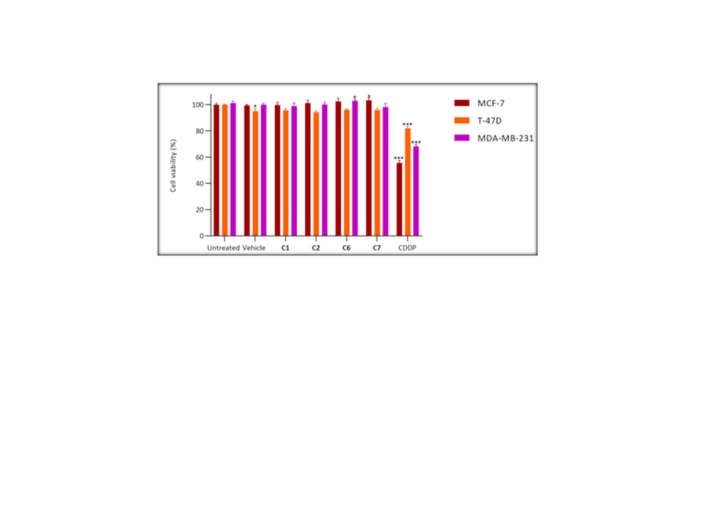


#### Figure 5: Cell viability (%) of human cancer subtypes (MCF-7, T-47D, and MDA-MB-231) breast cancer cells after 20 µM 48-hour treatment as determined by the MTT assay.


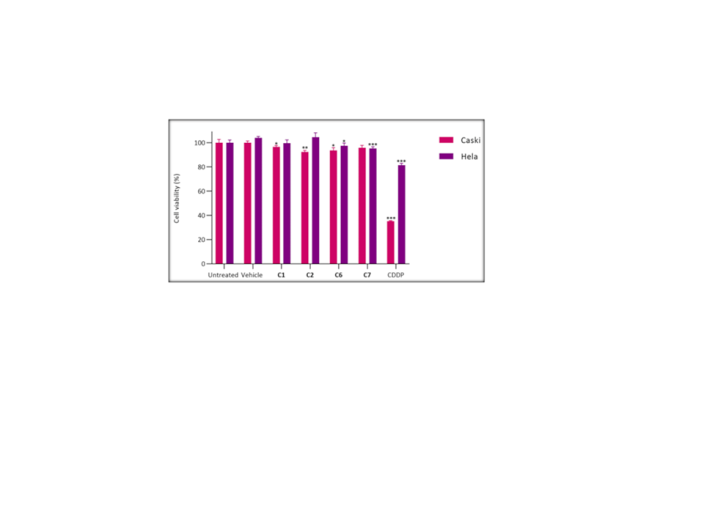


#### Figure 6: Cell viability (%) of human cancer subtypes (Caski & Hela) cervical cancer cells after 20 µM 48-hour treatment as determined by the MTT assay.


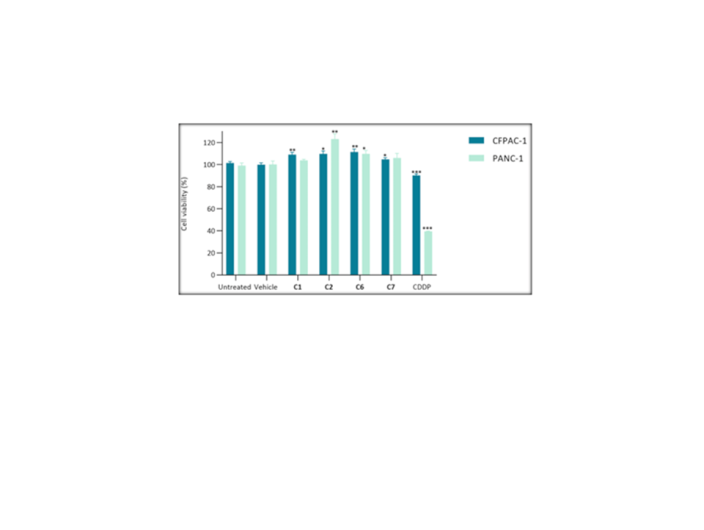


#### Figure 7: Cell viability (%) of human cancer subtypes (CFPAC-1 & PANC-1) pancreatic cancer cells after 20 µM 48-hour treatment as determined by the MTT assay.


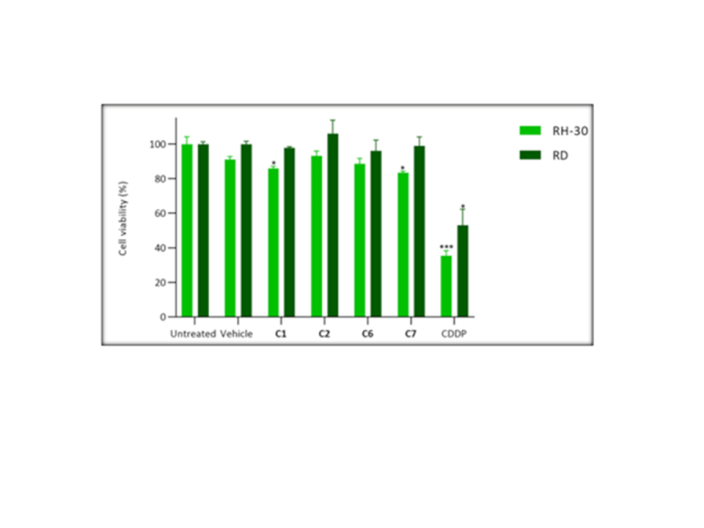


#### Figure 8: Cell viability (%) of human cancer subtypes (RH-30 & RD) rhabdomyosarcoma cancer cells after 20 µM 48-hour treatment as determined by the MTT assay.

The weaker activity observed for **RuL1**–**RuL4** can be attributed to their enhanced electronic and steric stability. Methylation on the pyrazole ring (in **RuL3** and **RuL4**) slightly increases electron density at the Ru(II) center, but spectroscopic data (NMR, FTIR) reveal minimal changes in coordination geometry or donor strength. Furthermore, replacing *p*-cymene with toluene does not significantly affect electron donation, consistent with literature showing that arene substitution primarily influences redox lability rather than ground-state structure [61,65,71]. The large calculated HOMO–LUMO gaps (~4.0 eV) for **RuL1**–**RuL4** correlate with their low reactivity, whereas reported active analogues possess narrower gaps (2.5–3.5 eV), supporting the view that excessive stability suppresses biological activation processes such as aquation and redox cycling. Collectively, these findings emphasize a crucial structure–activity relationship: fine-tuning the bpzm backbone and electronic environment of Ru(II) complexes may substantially enhance cytotoxic potency while preserving selectivity.

## Conclusions

This study demonstrates a clear structure–activity relationship in η⁶-arene ruthenium(II) half-sandwich complexes. Crystallographic and spectroscopic analyses confirmed robust piano-stool geometries, while DFT calculations validated these structures and revealed frontier orbital distributions consistent with high electronic hardness and large HOMO–LUMO gaps (~4.0 eV). These features, only minimally affected by pyrazole methylation or arene substitution, correlate directly with the poor cytotoxicity observed (cell viability ≥ 100%).

Collectively, the results demonstrate that although structural and redox stability are desirable for complex integrity, excessive rigidity suppresses biological activation pathways. Effective therapeutic design will therefore require ligand architectures that balance kinetic robustness with tunable electronic flexibility, enabling charge-transfer processes and biomolecular interactions. Incorporating π-acceptor, conjugated, or moderately labile substituents into the ligand scaffold may lower ΔE, enhance MLCT efficiency, and unlock the latent cytotoxic potential of this Ru(II) arene platform.

Supplementary Materials:

You can access the following information online.

## CRediT authorship contribution statement

A.K.K. conducted the investigation, conceptualized the study, carried out the synthesis, and contributed to drafting the manuscript. A.W. performed cell viability assays, conducted data analysis, and drafting. P.O. contributed to conceptualization, provided partial funding, supervision, and review. J.O.O. involved in study conceptualization and contributed to the manuscript review. J.G. supported synthesis with partial funding and manuscript review. A.M. contributed to compound characterization, partial funding, drafting, and reviewing. S.P. provided partial funding for cell viability studies and participated in reviewing. G.S.S. contributed to cell viability studies, provided partial funding, and reviewing. R.O.O responsible for spectral characterization, and contributed to writing and reviewing. All authors have read and approved the final version of the manuscript.

**Funding**: *This research did not receive any specific grant from funding agencies in the public, commercial, or not-for-profit sectors.*

**Data Availability Statement:** The supplementary crystallographic data for **RuL2, RuL4, RuL3** and **RuL1** (for Ref codes: cu_am_ro_am_1/2/6/7_0m) and CDCC Nos: 2470090, 2470091, 2470092 and 2470093**,** respectively can be obtained free of charge via <http://www.ccdc.cam.ac.uk/conts/retrieving.html> (accessed on 4th July 2025), or from the Cambridge Crystallographic Data Centre, 12 Union Road, Cambridge CB2 1EZ, UK; fax: (+44)1223-336-033; or via email: deposit@ccdc.cam.ac.uk.

**Acknowledgments**: The authors gratefully acknowledge the Department of Chemistry, Egerton University (Kenya) for support during the synthesis phase. Partial funding for characterization and cytotoxicity studies was provided by the School of Chemistry, University of KwaZulu-Natal, and the Departments of Chemistry and Human Biology, University of Cape Town (South Africa). The authors also acknowledge Mrs. C. J. van Rensburg for assistance with mass spectrometry and Mr. C. Grimmer for NMR analysis.

**Conflicts of Interest**: The authors declare no competing financial or non-financial interests.

**References**

1. Bergamo, A.; Gaiddon, C.; Schellens, J.; Beijnen, J.; Sava, G. Approaching tumour therapy beyond platinum drugs: status of the art and perspectives of ruthenium drug candidates. *Journal of Inorganic Biochemistry* **2012**, *106*, 90-99, doi:<https://doi.org/10.1016/j.jinorgbio.2011.09.030>.

2. Yusoh, N.A.; Chia, S.L.; Saad, N.; Ahmad, H.; Gill, M.R. Synergy of ruthenium metallo-intercalator, [Ru (dppz)2(PIP)]2+, with PARP inhibitor Olaparib in non-small cell lung cancer cells. *Scientific Reports* **2023**, *13*, 1456, doi:<https://doi.org/10.1038/s41598-023-28454-x>.

3. Arshi, F.; Bano, S.; Parveen, S.; Banerjee, M.; Kushwaha, N.K.; Singh, S.K.; Kumar, A.; Singh, A.K. Design, synthesis, and biological insights of half sandwich ruthenium–arene schiff base complexes: Molecular docking and DFT. *ChemistrySelect* **2025**, *10*, e202404895, doi:10.1002/slct.202404895.

4. Arunachalam, A.; Rengan, R. Synthesis and structure of naphthoyl thiourea‐based binuclear ruthenium(II) arene complexes: studies on anticancer activity and apoptotic mechanism. *ChemBioChem* **2025**, *26*, e202500057, doi:10.1002/cbic.202500057.

5. Bashir, M.; Mantoo, I.A.; Arjmand, F.; Tabassum, S.; Yousuf, I. An overview of advancement of organoruthenium(II) complexes as prospective anticancer agents. *Coordination Chemistry Reviews* **2023**, *487*, 215169, <https://doi.org/10.1016/j.ccr.2023.215169>

6. Bhattacharya, S.; Adon, T.; Dsouza, K.; Kumar, H.Y. Exploring the future of metal‐based anticancer agents: A comprehensive review of ruthenium‐based omplexes. *ChemistrySelect* **2025**, *10*, e202404147, <https://doi.org/10.1002/slct.202404147>

7. Han Ang, W.; Dyson, P.J. Classical and non‐classical ruthenium‐based anticancer drugs: Towards targeted chemotherapy. *European Journal Inorganic Chemistry* **2006**, *2006*, 4003-4018, doi:<https://doi.org/10.1002/ejic.200600723>.

8. Herić, A.; Dibranin, N.; Martić, L.; Hodžić, E.; Zahirović, A.; Kozarić, A.K. Ruthenium-based complexes as anti-tumor agents. *Journal of Health Sciences* **2024**, *14*, 70-83, <https://doi.org/10.17532/jhsci.2024.2693>.

9. D’Amato, A.; Mariconda, A.; Iacopetta, D.; Ceramella, J.; Catalano, A.; Sinicropi, M.S.; Longo, P. Complexes of ruthenium(II) as promising dual-active agents against cancer and viral infections. *Pharmaceuticals* **2023**, *16*, 1729, <https://doi.org/10.3390/ph16121729>.

10. Alessio, E. Thirty years of the drug candidate NAMI‐A and the myths in the field of ruthenium anticancer compounds: a personal perspective. *European Journal of Inorganic Chemistry* **2017**, *2017*, 1549-1560, <https://doi.org/10.1002/ejic.201600986>.

11. Allardyce, C.S.; Dorcier, A.; Scolaro, C.; Dyson, P.J. Development of organometallic (organo‐transition metal) pharmaceuticals. *Applied Organometallic Chemistry* **2005**, *19*, 1-10, doi: <https://doi.org/10.1002/aoc.725>.

12. Galanski, M.; Arion, V.; Jakupec, M.; Keppler, B. Recent developments in the field of tumor-inhibiting metal complexes. *Current Pharmaceutical Design* **2003**, *9*, 2078-2089, doi:<https://doi.org/10.2174/1381612033454180>.

13. Pereira, S.A.; Romano-deGea, J.; Barbosa, A.I.; Lima, S.A.C.; Dyson, P.J.; Saraiva, M.L.M. Fine-tuning the cytotoxicity of ruthenium(II) arene compounds to enhance selectivity against breast cancers. *Dalton Transaction.* **2023**, *52*, 11679-11690, DOI: [10.1039/D3DT02037A](https://doi.org/10.1039/D3DT02037A).

14. Lentz, F.; Drescher, A.; Lindauer, A.; Henke, M.; Hilger, R.A.; Hartinger, C.G.; Scheulen, M.E.; Dittrich, C.; Keppler, B.K.; Jaehde, U. Pharmacokinetics of a novel anticancer ruthenium complex (KP1019, FFC14A) in a phase I dose-escalation study. *Anti-Cancer Drugs* **2009**, *20*, 97-103, doi:<http://doi:10.1097/CAD.0b013e328322fbc5>.

15. Mahmud, K.M.; Niloy, M.S.; Shakil, M.S.; Islam, M.A. Ruthenium complexes: An alternative to platinum drugs in colorectal cancer treatment. *Pharmaceutics* **2021**, *13*, 1295, doi:<https://doi.org/10.3390/pharmaceutics13081295>.

16. Sonkar, C.; Sarkar, S.; Mukhopadhyay, S. Ruthenium(II)–arene complexes as anti-metastatic agents, and related techniques. *RSC Medicinal Chemistry* **2022**, *13*, 22-38.

17. Hanif, M.; Hartinger, C.G. Anticancer metallodrugs: where is the next cisplatin? *Future Medicinal Chemistry* **2018**, *10*, 615-617, doi:<https://doi:10.1016/j.drudis.2014.06.016>

18. Hartinger, C.G.; Jakupec, M.A.; Zorbas‐Seifried, S.; Groessl, M.; Egger, A.; Berger, W.; Zorbas, H.; Dyson, P.J.; Keppler, B.K. KP1019, a new redox‐active anticancer agent–Preclinical development and results of a clinical phase I study in tumor patients. *Chemistry & Biodiversity* **2008**, *5*, 2140-2155, doi:<https://doi.org/10.1002/cbdv.200890195>.

19. Rademaker-Lakhai, J.M.; Van Den Bongard, D.; Pluim, D.; Beijnen, J.H.; Schellens, J.H. A phase I and pharmacological study with imidazolium-trans-DMSO-imidazole-tetrachlororuthenate, a novel ruthenium anticancer agent. *Clinical Cancer Research* **2004**, *10*, 3717-3727, doi:<https://doi.org/10.1158/1078-0432.CCR-03-0746>.

20. Ferraro, M.G.; Piccolo, M.; Misso, G.; Santamaria, R.; Irace, C. Bioactivity and development of small non-platinum metal-based chemotherapeutics. *Pharmaceutics* **2022**, *14*, 954, doi:<https://doi.org/10.3390/pharmaceutics14050954>.

21. Lari, M.; Martínez-Alonso, M.; Busto, N.; Manzano, B.R.; Rodríguez, A.M.; Acuña, M.I.; Domínguez, F.; Albasanz, J.L.; Leal, J.M.; Espino, G. Strong influence of ancillary ligands containing benzothiazole or benzimidazole rings on cytotoxicity and photoactivation of Ru(II) arene complexes. *Inorganic Chemistry* **2018**, *57*, 14322-14336, doi:<https://doi.org/10.1021/acs.inorgchem.8b02299>.

22. Lucaciu, R.L.; Hangan, A.C.; Sevastre, B.; Oprean, L.S. Metallo-drugs in cancer therapy: Past, present and future. *Molecules* **2022**, *27*, 6485, doi:<https://doi.org/10.3390/molecules27196485>.

23. Peacock, A.F.; Sadler, P.J. Medicinal organometallic chemistry: designing metal arene complexes as anticancer agents. *Chemistry–An Asian Journal* **2008**, *3*, 1890-1899, doi:<https://doi:10.1002/asia.200800149>

24. Bruijnincx, P.C.; Sadler, P.J. Controlling platinum, ruthenium, and osmium reactivity for anticancer drug design. *Advances in Inorganic Chemistry* **2009**, *61*, 1-62, doi:<https://doi.org/10.1016/S0898-8838(09)00201-3>.

25. Guler, S.; Kayali, H.A.; Sadan, E.O.; Sen, B.; Subasi, E. Half-sandwich arene ruthenium(II) thiosemicarbazone complexes: evaluation of anticancer effect on primary and metastatic ovarian cancer cell lines. *Frontiers in Pharmacology* **2022**, *13*, 882756, doi:<https://doi.org/10.3389/fphar.2022.882756>.

26. Colina-Vegas, L.; Luna-Dulcey, L.; Plutín, A.M.; Castellano, E.E.; Cominetti, M.R.; Batista, A.A. Half sandwich Ru(II)-acylthiourea complexes: DNA/HSA-binding, anti-migration and cell death in a human breast tumor cell line. *Dalton Transaction* **2017**, *46*, 12865-12875, doi: <https://doi.org/10.1039/C7DT01801K>

27. Ismail, F.M. Important fluorinated drugs in experimental and clinical use. *Journal of Fluorine Chemistry* **2002**, *118*, 27-33, doi:<https://doi.org/10.1016/S0022-1139(02)00201-4>.

28. Pizarro, A.M.; Habtemariam, A.; Sadler, P.J. Activation mechanisms for organometallic anticancer complexes. *Medicinal Organometallic Chemistry* **2010**, 21-56, doi: <https://doi.org/10.1007/978-3-642-13185-1_2>.

29. Hartinger, C.G.; Dyson, P.J. Bioorganometallic chemistry—from teaching paradigms to medicinal applications. *Chemical Society Reviews* **2009**, *38*, 391-401, doi:<https://doi.org/10.1039/B707077M>.

30. Khanvilkar, P.; Pulipaka, R.; Shirsath, K.; Devkar, R.; Chakraborty, D. Organometallic binuclear Ru(II) complexes: Design, synthesis, DNA/BSA binding interactions and in-vitro cytotoxicity against HeLa cell line. *Inorganic Chemistry Communications* **2019**, *102*, 134-140, doi:<https://doi.org/10.1016/j.inoche.2019.02.023>.

31. Wang, H.Y.; Qian, Y.; Wang, F.X.; Habtemariam, A.; Mao, Z.W.; Sadler, P.J.; Liu, H.K. Ruthenium(II)–arene metallacycles: crystal structures, interaction with DNA, and cytotoxicity. *Europen Journal of Inorgorganic Chemistry* **2017**, *2017*, 1792-1799, doi:<http://doi:10.1002/ejic.201601226>

32. Cervinka, J.; Gobbo, A.; Biancalana, L.; Markova, L.; Novohradsky, V.; Guelfi, M.; Zacchini, S.; Kasparkova, J.; Brabec, V.; Marchetti, F. Ruthenium(II)–tris-pyrazolylmethane complexes inhibit cancer cell growth by disrupting mitochondrial calcium homeostasis. *Journal of Medicinal Chemistry* **2022**, *65*, 10567-10587, doi:<https://doi.org/10.1021/acs.jmedchem.2c00722>.

33. Mondal, A.; Paira, P. Hypoxia efficient and glutathione-resistant cytoselective ruthenium(II)-*p-*cymene-arylimidazophenanthroline complexes: biomolecular interaction and live cell imaging. *Dalton Transaction* **2020**, *49*, 12865-12878, doi:<http://doi.org/10.1039/D0DT02069A>.

34. de Araujo-Neto, J.H.; Guedes, A.P.; Leite, C.M.; Moraes, C.A.F.; Santos, A.L.; Brito, R.d.S.; Rocha, T.L.; Mello-Andrade, F.; Ellena, J.; Batista, A.A. “Half-sandwich” ruthenium complexes with alizarin as anticancer agents: *In* *vitro* and *in vivo* studies. *Inorganic Chemistry* **2023**, *62*, 6955-6969, doi:<https://doi.org/10.1021/acs.inorgchem.3c00183>.

35. Rogala, P.; Jabłońska-Wawrzycka, A.; Czerwonka, G.; Kazimierczuk, K.; Gałczyńska, K.; Michałkiewicz, S.; Kalinowska-Tłuścik, J.; Karpiel, M.; Klika, K.D. Synthesis, characterization and biological investigations of half-sandwich ruthenium(II) complexes containing benzimidazole moiety. *Molecules* **2022**, *28*, 40, doi:<https://doi.org/10.3390/molecules28010040>.

36. Cardozo, C.; Pizarro, A.M. Facile Method to Obtain Functionalised η6‐Bound Arenes in Ru(II) and Os(II) Half‐Sandwich Complexes. *Chemistry–A European Journal* **2024**, *30*, e202402799, doi: <https://doi.org/10.1002/chem.202402799>.

37. Kanyora, A.K.; Omondi, R.O.; Ongoma, P.; Omolo, J.O.; Welsh, A.; Prince, S.; Gichumbi, J.; Mambanda, A.; Smith, G.S. Mononuclear η6-arene ruthenium(II) complexes with pyrazolyl–pyridazine ligands: synthesis, CT-DNA binding, reactivity towards glutathione, and cytotoxicity. *JBIC Journal of Biological Inorganic Chemistry* **2024**, *29*, 251-264, https://doi.org/10.1007/s00775-024-02043-3.

38. Kozieł, S.; Wojtala, D.; Szmitka, M.; Lesiów, M.; Ziółkowska, A.; Sawka, J.; Del Carpio, E.; Crans, D.C.; Komarnicka, U.K. Half‐Sandwich Organometallic Ir(III) and Ru(II) Compounds and their Interactions with Biomolecules. *ChemPlusChem* **2025**, e202400621, doi:10.1002/cplu.202400621.

39. Grozav, A.; Balacescu, O.; Balacescu, L.; Cheminel, T.; Berindan-Neagoe, I.; Therrien, B. Synthesis, anticancer activity, and genome profiling of thiazolo arene ruthenium complexes. *Journal of Medicinal Chemistry* **2015**, *58*, 8475-8490, doi:<https://doi.org/10.1021/acs.jmedchem.5b00855>.

40. Aradhyula, B.P.R.; Mawnai, I.L.; Kollipara, M.R. Pyrazole Based Mono‐and Di‐Substituted Half Sandwich d6 Platinum Group Metal Complexes: Synthesis and Spectral Characterization. *Zeitschrift für anorganische und allgemeine Chemie* **2019**, *645*, 79-86, doi: <https://doi.org/10.1002/zaac.201800292>.

41. Balbi, A.; Anzaldi, M.; Macciò, C.; Aiello, C.; Mazzei, M.; Gangemi, R.; Castagnola, P.; Miele, M.; Rosano, C.; Viale, M. Synthesis and biological evaluation of novel pyrazole derivatives with anticancer activity. *European Journal of Medicinal Chemistry* **2011**, *46*, 5293-5309, doi:<https://doi.org/10.1016/j.ejmech.2011.08.014>.

42. Montani, M.; Pazmay, G.V.B.; Hysi, A.; Lupidi, G.; Pettinari, R.; Gambini, V.; Tilio, M.; Marchetti, F.; Pettinari, C.; Ferraro, S. The water soluble ruthenium(II) organometallic compound [Ru(*p*-cymene)(bis(3,5-dimethylpyrazol-1-yl)methane)Cl] Cl suppresses triple negative breast cancer growth by inhibiting tumor infiltration of regulatory T cells. *Pharmacological Research* **2016**, *107*, 282-290, doi:<https://doi.org/10.1016/j.phrs.2016.03.032>.

43. Nielsen, T.O.; Hsu, F.D.; Jensen, K.; Cheang, M.; Karaca, G.; Hu, Z.; Hernandez-Boussard, T.; Livasy, C.; Cowan, D.; Dressler, L. Immunohistochemical and clinical characterization of the basal-like subtype of invasive breast carcinoma. *Clinical Cancer Research* **2004**, *10*, 5367-5374, doi:<https://doi.org/10.1158/1078-0432.CCR-04-0220>.

44. Vicentini, C.B.; Romagnoli, C.; Andreotti, E.; Mares, D. Synthetic pyrazole derivatives as growth inhibitors of some phytopathogenic fungi. *Journal of Agricultural and Food Chemistry* **2007**, *55*, 10331-10338, doi:<https://doi.org/10.1021/jf072077d>.

45. Seguí, P.; Aguilera-Correa, J.J.; Domínguez-Jurado, E.; Sánchez-López, C.M.; Pérez-Tanoira, R.; Ocaña, A.V.; Castro-Osma, J.A.; Esteban, J.; Marcilla, A.; Alonso-Moreno, C. A novel bis(pyrazolyl) methane compound as a potential agent against Gram-positive bacteria. *Scientific Reports* **2021**, *11*, 16306, doi:<https://doi.org/10.1038/s41598-021-95609-z>.

46. Gökhan-Kelekçi, N.; Yabanoğlu, S.; Küpeli, E.; Salgın, U.; Özgen, Ö.; Uçar, G.; Yeşilada, E.; Kendi, E.; Yeşilada, A.; Bilgin, A.A. A new therapeutic approach in Alzheimer disease: some novel pyrazole derivatives as dual MAO-B inhibitors and antiinflammatory analgesics. *Bioorganic & Medicinal Chemistry* **2007**, *15*, 5775-5786, doi:<https://doi.org/10.1016/j.bmc.2007.06.004>.

47. Potapov, A.S.; Khlebnikov, A.I. Synthesis of mixed-ligand copper(II) complexes containing bis(pyrazol-1-yl) methane ligands. *Polyhedron* **2006**, *25*, 2683-2690, doi:<http://doi.org/10.1016/j.poly.2006.03.016>.

48. Gichumbi, J.M.; Friedrich, H.B.; Omondi, B. Synthesis and characterization of half-sandwich ruthenium(II) complexes with N-alkyl pyridyl-imine ligands and their application in transfer hydrogenation of ketones. *Transition Met. Chem.* **2016**, *41*, 867-877, doi:<https://doi:10.1007/s11243-016-0089-5>.

49. CrysAlis, C. CrysAlis Red. *Xcalibur PX Software, Oxford Diffraction Ltd., Abingdon, England* **2008**.

50. Bruker, A. Saint and SADABS. *Bruker AXS Inc., Madison, Wisconsin, USA* **2009**.

51. Dolomanov, O.; Bourhis, L.; Gildea, R.; Howard, J.; Puschmann, H. OLEX2: A complete structure solution, refinement and analysis program. *Journal of Applied Crystallography* **2009**, *42*, 339-341, doi:<https://doi:10.1107/S0021889808042726>.

52. Sheldrick, G.M. SHELXT–Integrated space-group and crystal-structure determination. *Acta Crystallogr. A: Found. Adv.* **2015**, *71*, 3-8, doi:<http://doi:10.1107/S2053273314026370>.

53. Frisch, M.; Trucks, G.W.; Schlegel, H.B.; Scuseria, G.E.; Robb, M.A.; Cheeseman, J.R.; Scalmani, G.; Barone, V.; Mennucci, B.; Petersson, G. Gaussian 09, revision D. 01. **2009**.

54. Becke, A.D. Becke’s three parameter hybrid method using the LYP correlation functional. *Journal of Chemical Physics* **1993**, *98*, 5648-5652, doi: <https://doi.org/10.1063/1.464913>.

55. Lee, C.; Yang, W.; Parr, R.G. Development of the Colle-Salvetti correlation-energy formula into a functional of the electron density. *Physical Review B:* **1988**, *37*, 785-789, doi:<https://doi:10.1103/PhysRevB.37.785>.

56. Barone, V.; Cossi, M. Quantum calculation of molecular energies and energy gradients in solution by a conductor solvent model. *Journal of Physical Chemistry A.* **1998**, *102*, 1995-2001, doi:<http://doi:10.1021/jp9716997>.

57. Cossi, M.; Rega, N.; Scalmani, G.; Barone, V. Energies, structures, and electronic properties of molecules in solution with the C‐PCM solvation model. *Journal of Computational Chemistry* **2003**, *24*, 669-681, doi:<https://doi:10.1002/jcc.10189>

58. Mosmann, T. Rapid colorimetric assay for cellular growth and survival: application to proliferation and cytotoxicity assays. *Journal of Immunological Methods* **1983**, *65*, 55-63, doi:<http://doi.org/10.1002/(SICI)1099-1395(199808/09)11:8/9><577::AID-POC53>3.0.CO;2-X

59. Berridge, M.V.; Tan, A.S. Characterization of the cellular reduction of 3-(4,5-dimethylthiazol-2-yl)-2,5-diphenyltetrazolium bromide (MTT): subcellular localization, substrate dependence, and involvement of mitochondrial electron transport in MTT reduction. *Archives of Biochemistry and Biophysics* **1993**, *303*, 474-482, doi:<https://doi:10.1006/abbi.1993.1311>

60. Welsh, A.; Rylands, L.-i.; Arion, V.B.; Prince, S.; Smith, G.S. Synthesis and antiproliferative activity of benzimidazole-based, trinuclear neutral cyclometallated and cationic, N^N-chelated ruthenium(II) complexes. *Dalton Transactions* **2020**, *49*, 1143-1156, doi:<http://doi:10.1039/C9DT03902C>

61. Matveevskaya, V.V.; Pavlov, D.I.; Samsonenko, D.G.; Ermakova, E.A.; Klyushova, L.S.; Baykov, S.V.; Boyarskiy, V.P.; Potapov, A.S. Synthesis and structural characterization of half-sandwich arene–ruthenium(II) Complexes with bis(imidazol-1-yl)methane, Imidazole and Benzimidazole. *Inorganics* **2021**, *9*, 34, doi:<http://doi:10.3390/inorganics9050034>

62. Fernández, R.; Melchart, M.; Habtemariam, A.; Parsons, S.; Sadler, P.J. Use of chelating ligands to tune the reactive site of half‐sandwich ruthenium(II) – arene anticancer complexes. *Chemistry – A European Journal* **2004**, *10*, 5173-5179, doi:<http://doi.org/10.1002/chem.200400640>.

63. Peacock, A.F.; Habtemariam, A.; Moggach, S.A.; Prescimone, A.; Parsons, S.; Sadler, P.J. Chloro half-sandwich osmium(II) complexes: influence of chelated N, N-ligands on hydrolysis, guanine binding, and cytotoxicity. *Inorganic Chemistry* **2007**, *46*, 4049-4059, doi:<https://doi:10.1021/ja068335p>.

64. Reshma, G.; Nakul, S.; Mahitha, P.; Naveen, V.K.; Sharma, S.; William, W.B.; William, D.J. Synthesis and molecular structure of half-sandwich ruthenium(II) complexes containing pyrazolyl ligands: Solvent induced geometrical change in κ2-scorpionate supported complex. *J. Mol. Struct.* **2022**, *1251*, 132005, doi:<https://doi.org/10.1016/j.molstruc.2021.132005>.

65. Marchetti, F.; Pettinari, C.; Pettinari, R.; Cerquetella, A.; Di Nicola, C.; Macchioni, A.; Zuccaccia, D.; Monari, M.; Piccinelli, F. Synthesis and intramolecular and interionic structural characterization of half-sandwich (arene) ruthenium(II) derivatives of bis(pyrazolyl) alkanes. *Inorganic Chemistry* **2008**, *47*, 11593-11603, doi:<http://doi:10.1021/ic801150c>.

66. Domínguez-Jurado, E.; Ripoll, C.; Lara-Sánchez, A.; Ocaña, A.; Vitórica-Yrezábal, I.J.; Bravo, I.; Alonso-Moreno, C. Evaluation of heteroscorpionate ligands as scaffolds for the generation of Ruthenium(II) metallodrugs in breast cancer therapy. *Journal of Inorganic Biochemistry* **2024**, *253*, 112486, doi:<https://doi:10.1016/j.jinorgbio.2024.112486>].

67. Montani, M.; Pazmay, G.V.B.; Hysi, A.; Lupidi, G.; Pettinari, R.; Gambini, V.; Tilio, M.; Marchetti, F.; Pettinari, C.; Ferraro, S. The water soluble ruthenium(II) organometallic compound [Ru(*p*-cymene)(bis(3, 5 dimethylpyrazol-1-yl) methane)Cl] Cl suppresses triple negative breast cancer growth by inhibiting tumor infiltration of regulatory T cells. *Pharmacological Research* **2016**, *107*, 282-290, <https://doi.org/10.1016/j.phrs.2016.03.032>

68. Annunziata, A.; Cucciolito, M.E.; Di Ronza, M.; Ferraro, G.; Hadiji, M.; Merlino, A.; Ortiz, D.; Scopelliti, R.; Fadaei Tirani, F.; Dyson, P.J. Ruthenium (II)–Arene Complexes with Glycosylated NHC-Carbene Co-Ligands: Synthesis, Hydrolytic Behavior, and Binding to Biological Molecules. *Organometallics* **2023**, *42*, 952-964, <https://doi.org/10.1021/acs.organomet.3c00128>.

69. Uysal, M.E.; Solmaz, U.; Arslan, H. Ru(II) and Ru(III) complexes containing N‐acylthiourea ligands: Supramolecular structures and synthons, reduction, and reaction pathway of aromatic nitro compounds. *Applied Organometallic Chemistry* **2023**, *37*, e7107, <https://doi.org/10.1002/aoc.7107>.

70. Muralisankar, M.; Chen, J.-R.; Haribabu, J.; Ke, S.-C. Effective and selective Ru (II)-arene complexes containing 4,4′-substituted 2,2′ bipyridine ligands targeting human urinary bladder cancer cells. *International Journal of Molecular Sciences* **2023**, *24*, 11896, <https://doi.org/10.3390/ijms241511896>.

70. Domínguez-Jurado, E.; Ripoll, C.; Lara-Sánchez, A.; Ocaña, A.; Vitórica-Yrezábal, I.J.; Bravo, I.; Alonso-Moreno, C. Evaluation of heteroscorpionate ligands as scaffolds for the generation of ruthenium(II) metallodrugs in breast cancer therapy. *Journal of Inorganic Biochemistry* **2024**, *253*, 112486, doi:<https://doi:10.1016/j.jinorgbio.2024.112486>].

71. Allison, M.; Caramés-Méndez, P.; Hofmann, B.J.; Pask, C.M.; Phillips, R.M.; Lord, R.M.; McGowan, P.C. Cytotoxicity of ruthenium(II) arene complexes containing functionalized ferrocenyl β-diketonate ligands. *Organometallics* **2023**, *42*, 1869-1881, https: //doi.org/10.1021/acs.organomet.2c00553
