# Supplementary material for: Ruthenium-Arene Complexes with Bis(pyrazol-1-yl)methane Ligands: Structural, DFT Analysis, and Cytotoxicity Studies
Source: Research Square preprint supplement (doi:10.21203/rs.3.rs-8388864/v1), 2025-12-23
Supplement: Supplementary file 2 [file 7e56ec37a2ff20b3001dffd5.docx]

# Ruthenium-Arene Complexes with Bis(pyrazol-1-yl)methane Ligands: Structural, DFT Analysis, and Cytotoxicity Studies

Amos K. Kanyora[a]*, Athi Welsh [b], Peter Ongoma[a]*, Josiah O. Omolo[a],Joel Gichumbi[c], Allen Mambanda[d], Sharon Prince[e], Gregory S. Smith [b], Reinner O. Omondi [b][f]*

[a] Department of Chemistry, Egerton University, P.O Box 536-20115, Egerton, Kenya.

[b] Department of Chemistry, University of Cape Town, Rondebosch 7701, South Africa

[c] Department of Physical Sciences, Chuka University, P.O. Box 109-60400, Chuka, Kenya.

[d] School of Chemistry and Physics, University of KwaZulu-Natal, Private Bag X01, Scottsville, Pietermaritzburg 3209, South Africa.

[e] Department of Human Biology, University of Cape Town, Faculty of Health Science, Observatory 7925, South Africa

[f] Department of Medicinal Chemistry, University of Kansas, Lawrence, 66045, USA

Amos K. Kanyora ([kimem.aka12@gmail.com](mailto:kimem.aka12@gmail.com))*, Athi Welsh ([WLSATH001@myuct.ac.za](mailto:WLSATH001@myuct.ac.za)), Peter Ongoma ([ongoma@yahoo.com](mailto:ongoma@yahoo.com))*, Josiah O. Omolo ([jomolo@egerton.ac.ke](mailto:jomolo@egerton.ac.ke)),Joel Gichumbi ([jsmwangi2009@gmail.com](mailto:jsmwangi2009@gmail.com)), Allen Mambanda ([mambandaallen@gmail.com](mailto:mambandaallen@gmail.com)), Sharon Prince ([sharon.prince@uct.ac.za](mailto:sharon.prince@uct.ac.za)), Gregory S. Smith ([gregory.smith@uct.ac.za](mailto:gregory.smith@uct.ac.za)), Reinner O. Omondi ([reinnerochola587@gmail.com](mailto:reinnerochola587@gmail.com))

**Supplementary Materials**

**Spectral data of the ligands complexes**

**[Ru(dpzm)(tol)Cl]BF4 (RuL1):** Yield 84.1 %, orange crystals. MS (ESI)+ *m/z* (% *I*pic) = 377 (100), [C14H16ClN4Ru+H]+; 1H NMR (500 MHz, DMSO-*d*6) δ (ppm), 8.22 (*d*, *J* = 4 Hz, 2H(pzm), 8.07 (*d*, *J* = 4 Hz, 2H(pzm), 7.08 (*d*, *J* = 14.4 Hz, 1H(pzm), 6.63 (*t*, *J* = 2.3 Hz, 2H(pzm), 6.34 (*d*, *J* = 14.4 Hz, 1H(pzm), 6.14, 6.03 and 5.96 (*d*, *J* = 5.9, 5.8, 5.6 Hz, 5H(tol.), 2.12 (*s*, 3H(methyl grp. of tol). 13C (100 MHz, *d*6-DMSO): δ (ppm): 148.58, C=N(pzm), 135.54 C-N(pzm), 108.56, C=C(pzm), 106.69, 89.73, 90.26, 85.31, 82.16, 79.72 (Ar-tol), 62.65 (-CH2, pzm), 19.05 (-CH3,tol). FTIR (KBr, , cm-1, w/m/s = weak/medium/strong intensity, shp/br =sharp/broad); 3133(w, Carom-H), 2945(w, CH2 methylene), 2109, 1516(m, (C=N), 1408(m. C=C), 1282(m, β(c=c)-CH), and 1038 (s, br BF4-). Elementary analysis: *Calculated for* C17H22BClF4N4Ru, %: C 37.64; H 4.00; N, 11.70; *found,* % C, 37.50; H, 3.86; N, 12.08.

**[Ru(dpzm)(cym)Cl]BF4 (RuL2):** Yield 40 %, orange crystals. MS (ESI)+ *m/z* (% *I*pic) = 419 (100), [C17H22ClN4Ru+H]+; 1H NMR (500 MHz, DMSO-*d*6) δ (ppm), 8.22 (*d*, *J* = 2.1 Hz, 2H(pzm), 8.00 (*d*, *J* = 2.1, 2H’(pzm), 7.07 (*d*, *J* = 14.4 Hz, 1H(pzm), 6.63 (*t*, *J* = 2.6 Hz, 2H(pzm), 6.25 and 5.95 (*d*, *J* = 5.6 Hz, 5.7 Hz, 4H(η6-*p*-cym.), 6.08 (*d*, *J* = 14.4 Hz, 1H(pzm), 2.85 (*septet*, *J* = 6.9 Hz, 1H(η6-*p*-cym’s –CH(isopropyl), 2.02 (*s*, 3H(methyl grp. of η6-*p*-cym), 1.23 (*d*, *J* = 6.9 Hz, 6H(η6-*p*-cym’s two methyl grps. of the isopropyl). FTIR (KBr, , cm-1, w/m/s = weak/medium/strong intensity, shp/br =sharp/broad); 3132(w, Carom-H), 2945(w, CH2methylene), 1516(m, (C=N), 1408(m. C=C), 1281(m, β(c=c)-CH), 1038 (s, br BF4-). Elementary analysis: *Calculated for* C17H22BClF4N4Ru, %: C 40.38; H 4.38; N, 11.08; *found,* % C, 40.18; H, 4.24; N, 11.40.

[**Ru(bdmpzm)(tol)Cl]BF4 (RuL3):** Yield 84 %, orange crystals. MS (ESI)+ *m/z* (% *I*pic) = 433 (100), [C18H24ClN4Ru+H]+; 1H NMR (500 MHz, DMSO-*d*6) δ (ppm), 6.50 (*d*, *J* = 16 Hz, 1H(pzm), 6.26 (*s*, 2H(pzm), 6.18 and 5.94 (*d*, *J* = 12 Hz, 4H(tol.), 6.04 (*d*, *J* = 16 Hz, 1H(tol), 2.48 (d, J = 9.5 Hz, 12H(methyl grp of pzm), 2.19 (*s*, 3H(methyl grp. of tol). 13C (100 MHz, *d*6-DMSO): δ (ppm) 155.45, C=N(Py), 143.40, C-N(Py), 108.44, C=C(Py), 104.59, 81.50, 78.88, (Ar, tol), 56.88, (-CH2Py), 18.52 (-CH3*tol*), 15.14 & 10.72 (-CH3Py). FTIR (KBr, , cm-1, w/m/s = weak/medium/strong intensity, shp/br =sharp/broad); 3061(w, Carom-H), 2953(w, CH2methylene), 2094, 1920, 1559(m, (C=N), 1422(m. C=C), 1284(m, β(c=c)-CH), 1034 (s, br BF4-), 830(m, shp, Ru-N) and 620(m, shp, Ru-Cl). Elementary analysis: *Calculated*, %: C 41.60; H 4.65; N, 10.78; *found,* % C, 41.76; H, 4.69; N, 10.84.

**[Ru(bdmpzm)(cym)Cl]BF4 (RuL4):** Yield 84 %, orange crystals. MS (ESI)+ *m/z* (% *I*pic) = 475 (100), [C21H30ClN4Ru+H]+; 1H NMR (500 MHz, DMSO-*d*6) δ (ppm), 6.52 (*d*, *J* = 15.5 Hz, 1H(pzm), 6.27 (*s*, 2H(pzm), 6.08 and 6.00 (*d*, *J* = 6.2 Hz, 4H(η6-*p*-cym.), 5.81 (*d*, *J* = 15.5 Hz, 1H(pzm), 2.77 (*d*, *J* = 6.6 Hz, 1H(η6-*p*-cym’s –CH(isopropyl), 2.48 (d, J = 9.5 Hz, 12H(methyl grp of pzm), 2.23 (*s*, 3H(methyl grp. of η6-*p*-cym), 1.09 (*d*, *J* = 6.9 Hz, 6H(η6-*p*-cym’s two methyl grps. of the isopropyl). 13C (100 MHz, *d*6-DMSO): δ (ppm) 155.80, C=N(Py), 143.41, C-N(Py), 108.54, C=C(Py), 106.44, 99.62, 84.52, 81.14, (Ar, p-Cym), 56.65, (-CH2Py), 30.89 (CH*p*-Cym), 21.94 (-CH3*p*-Cym), 17.76 (-Me2*p*-Cym), 15.14 & 10.72 (-CH3Py). FTIR (KBr, , cm-1, w/m/s = weak/medium/strong intensity, shp/br =sharp/broad); 3061(w, Carom-H), 2953(w, CH2methylene), 1555(m, (C=N), 1467(m. C=C), 1291(m, β(c=c)-CH), 1050 (s, br BF4-) and 830(m, shp, Ru-N). Elementary analysis: *Calculated*, %: C 44.89; H 5.38; N, 9.97; *found,* % C, 45.09; H, 5.11; N, 10.16.

**Support Information**

**
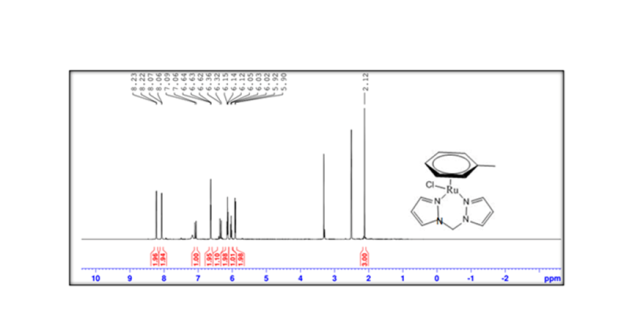
**

**Figure S1**: 1H NMR (500 MHz, DMSO-*d*6) spectrum of **RuL1**

**
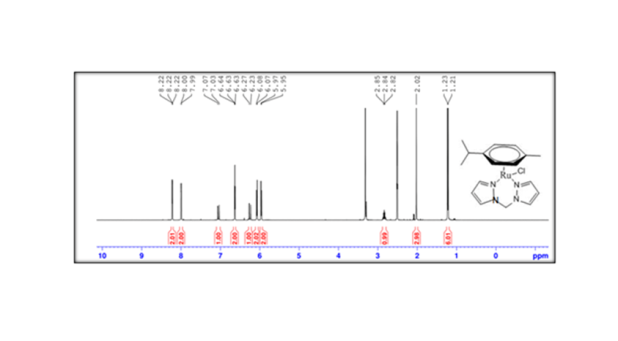
**

**Figure S2**: 1H NMR (500 MHz, DMSO-*d*6) spectrum of **RuL2**

**
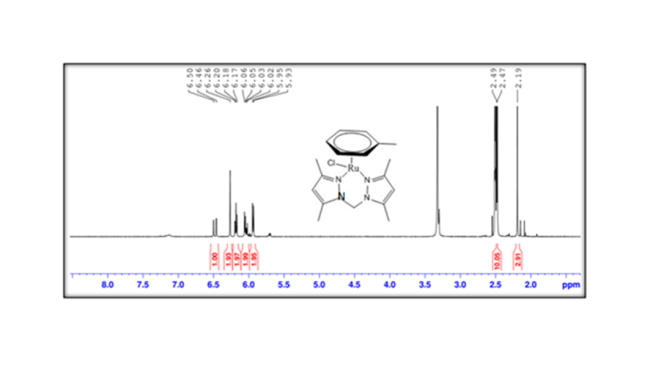
**

**Figure S3**: 1H NMR (500 MHz, DMSO-*d*6) spectrum of **RuL3**


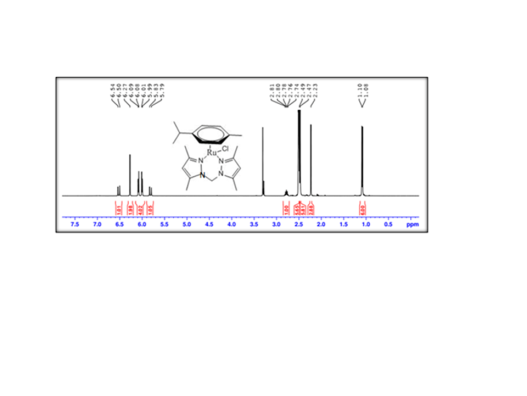


**Figure S4**: 1H NMR (500 MHz, DMSO-*d*6) spectrum of **RuL4**

**
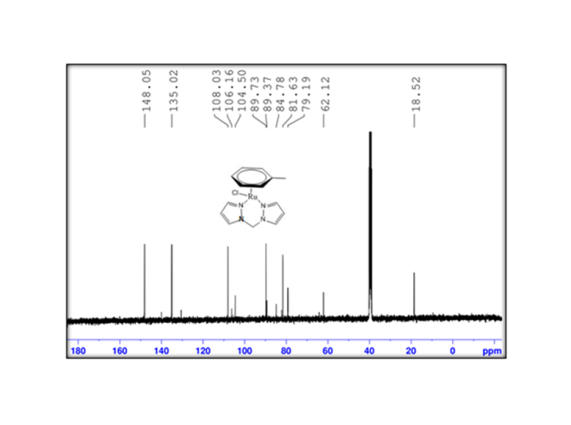
**

**Figure S5:** 13C NMR (100 MHz, DMSO-*d*6) spectrum of **RuL1**

**
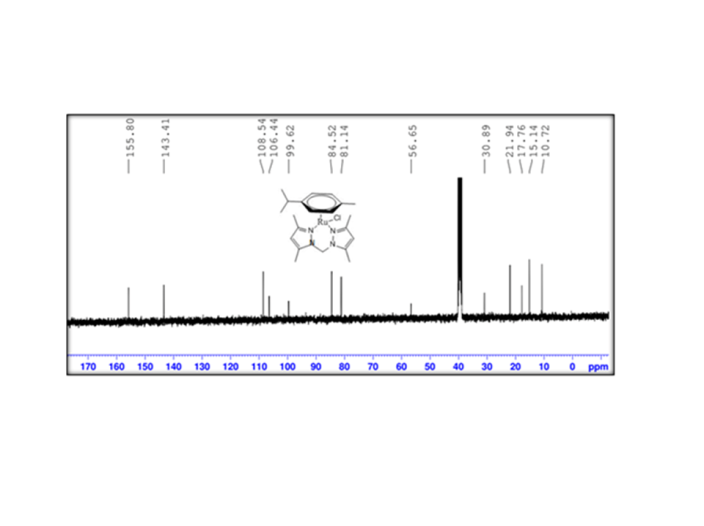
**

**Figure S6:** 13C NMR (100 MHz, DMSO-*d*6) spectrum of **RuL4**

**
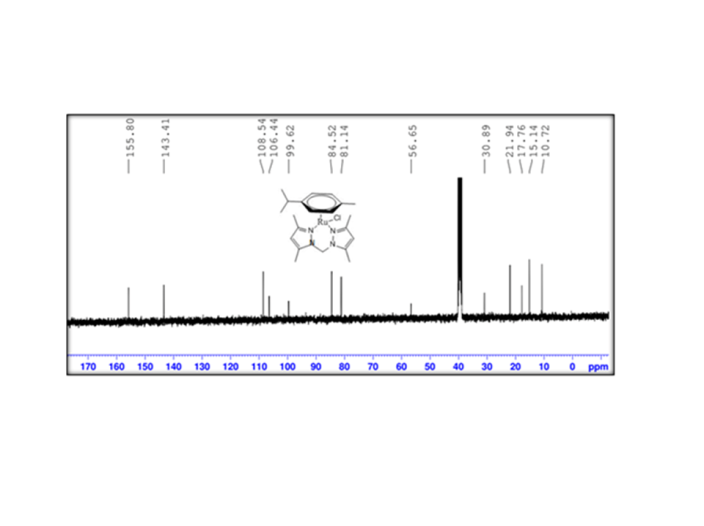
**

**Figure S7:** HSQC for **RuL4**

**
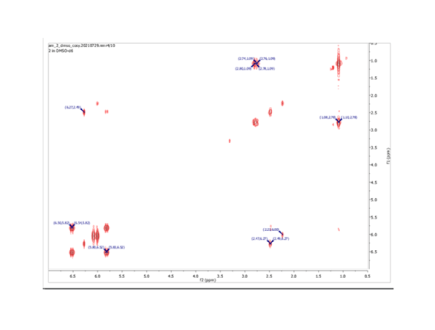
**

**Figure S8:** COSY for **RuL4**

**
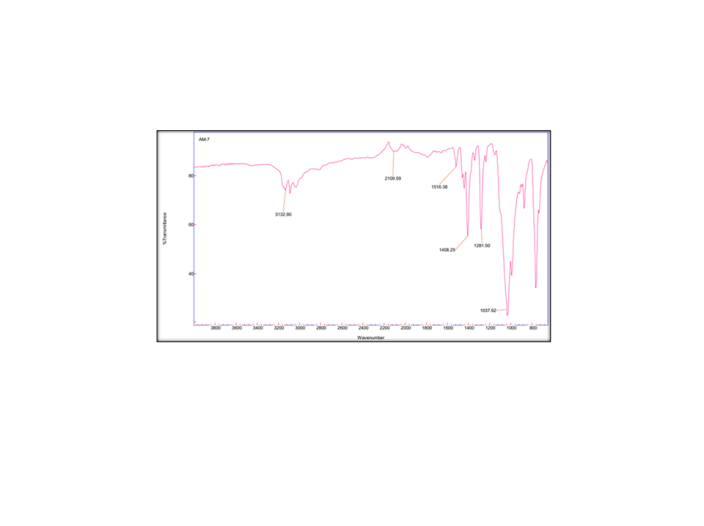
**

**Figure S9:** FTIR (dispersed in KBr) spectrum of **RuL1**

**
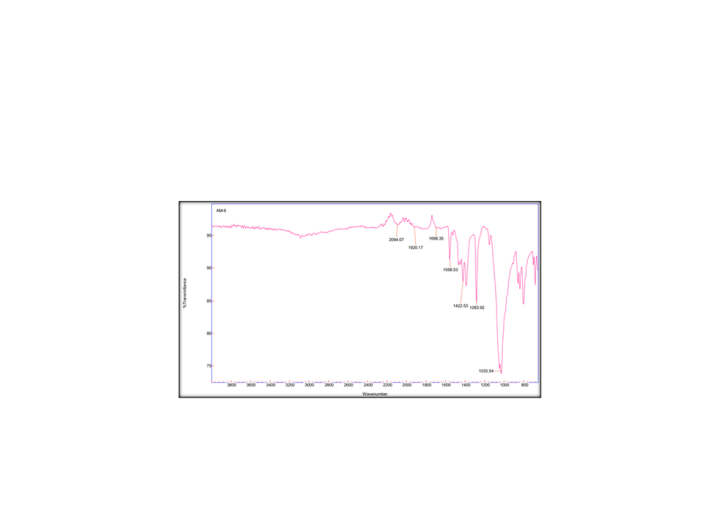
**

**Figure S10:** FTIR (dispersed in KBr) spectrum of **RuL3**


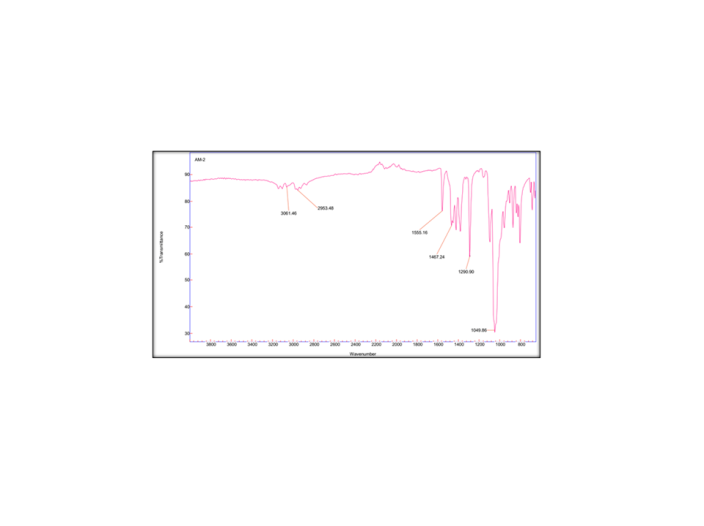


**Figure S11:** FTIR (dispersed in KBr) spectrum of **RuL4**


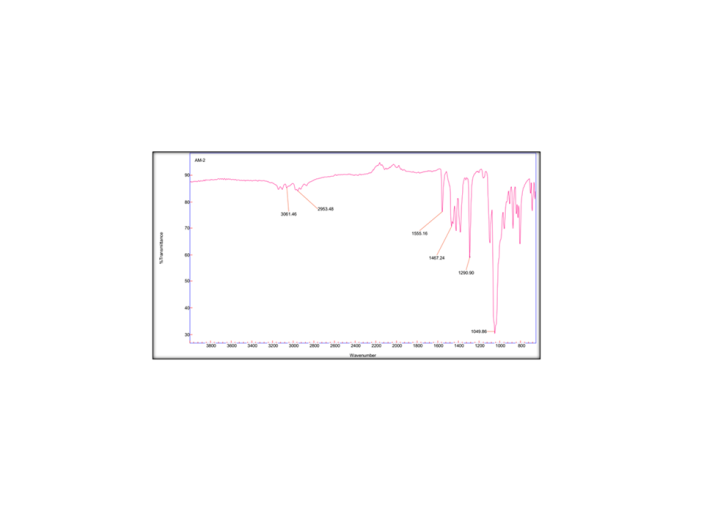


**Figure S12**: Low-resolution mass spectrum of **RuL1,** showing the *m/z* of 377 (100%) of the pseudo molecular ion peak, [C14H16ClN4Ru+H]+. Inset: predicted isotopic distribution mass spectrum of **RuL1** @: <https://www.sisweb.com/mstools/isotope.htm>

**
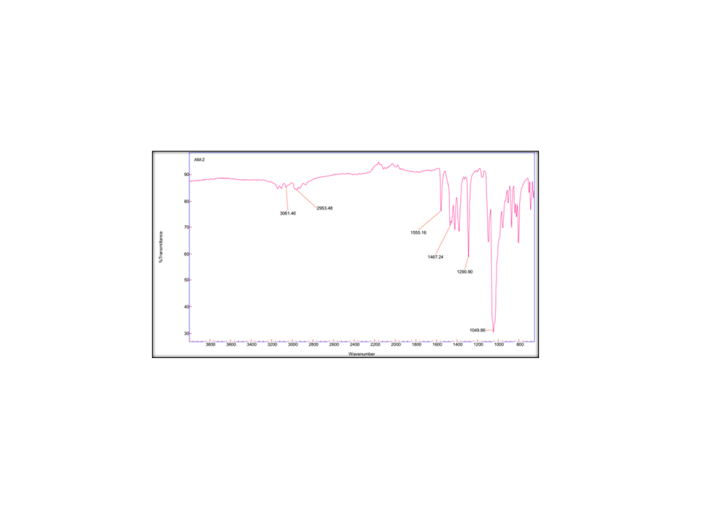
**

**Figure S13**: Low-resolution mass spectrum of **RuL2,** showing the *m/z* of 419 (100%) of the pseudo molecular ion peak, [C17H22ClN4Ru+H]+. Inset: predicted isotopic distribution mass spectrum of **RuL2** @: <https://www.sisweb.com/mstools/isotope.htm>

**
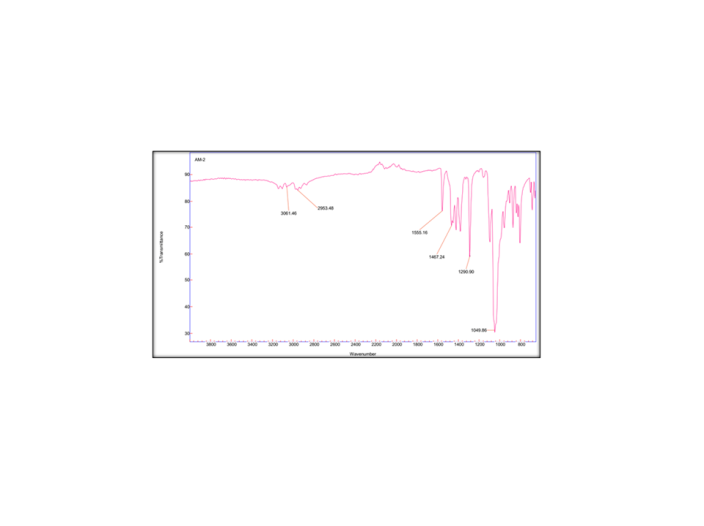
**

**Figure S14**: Low-resolution mass spectrum of **RuL3,** showing the *m/z* of 433 (100%) of the pseudo molecular ion peak, [C18H24ClN4Ru+H]+. Inset: predicted isotopic distribution mass spectrum of **RuL3** @: <https://www.sisweb.com/mstools/isotope.htm>


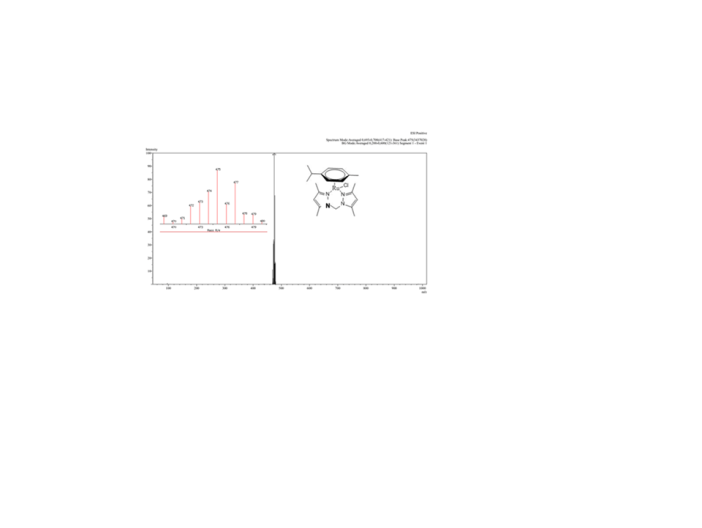


**Figure S15**: Low-resolution mass spectrum of **RuL4,** showing the *m/z* of 475 (100%) of the pseudo molecular ion peak, [C21H30ClN4Ru+H]+. Inset: predicted isotopic distribution mass spectrum of **RuL4** @: <https://www.sisweb.com/mstools/isotope.htm>


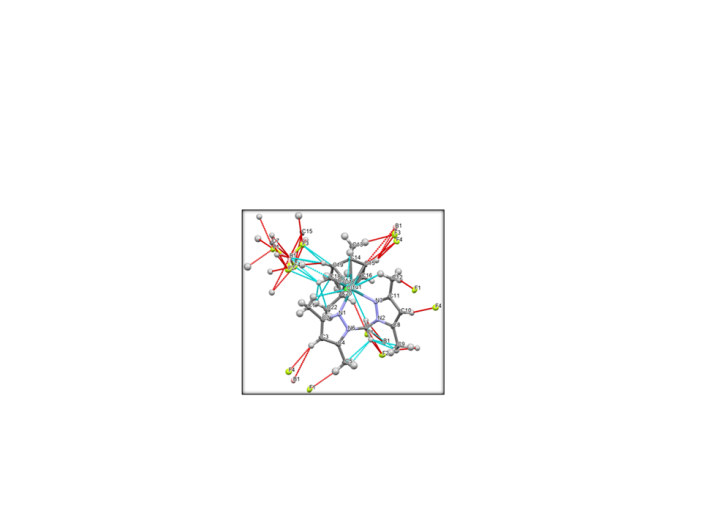


**Figure S16:** View of C-H…Cl, C-H…F and C-H…N interactions of **RuL4**. All the hydrogen atoms and the other complexes have been omitted for clarity.

**Table S1**: HSQC and COSY 2D-data of Complex **RuL4**.

| **HSQC** (see Figure S7**)** | | | **COSY** (see Figure S8) | |
| --- | --- | --- | --- | --- |
| **Carbon Number** | **Chemical shifts of correlated nuclei** | | **Chemical shifts (splitting pattern, and 3J coupling constants, Hz) of the correlated nuclei** | |
| 3C (ppm) | 1H (ppm) | **F1**  1H (ppm) | **F2**  1H (ppm) |
| 18/21 | 10.72 | 2.48 |  |  |
| 19/20 | 15.14 | 2.48 | 1.09 (d, 6.9) | 2.77 (d; 6.6) |
| 14 | 17.76 | 2.23 | 2.48 (d; 7.5) | 6.27 (s) |
| 16/17 | 21.94 | 1.09 | 5.81 (d; 15.5) | 6.52 (d, 15.5) |
| 15 | 30.89 | 2.77 | 6.00 (d; 6.2) | 2.23 (s) |
| 7 | 56.65 | 6.52, 5.81 | 6.27 (s) | 2.47 (d; 9.5) |
| 9/13 | 81.14 | 6.08 | 6.52 (d; 15.5) | 5.80 (d; 5.9) |
| 10/12 | 84.52 | 6.00 |  |  |
| 11 | 99.62 |  |  |  |
| 8 | 106.44 |  |  |  |
| 2/5 | 108.54 | 6.27 |  |  |
| 3/6 | 143.41 |  |  |  |
| 1/4 | 155.80 |  |  |  |

**Table S2:** Short contacts for complex **RuL4** (length in Å)

| 1 Ru1 H7B 3.057 | 22 H7A B1 2.936 |
| --- | --- |
| 2 Ru1 H12C 3.156 | 23 H7A F2 2.250 |
| 3 Ru1 H1C 3.168 | 24 H7B B1 3.053 |
| 4 Cl1 H12C 2.813 | 25 H7B F1 2.574 |
| 5 Cl1 H1C 2.791 | 26 C19 B1 3.586 |
| 6 Cl1 H13C 2.778 | 27 C19 F3 2.979 |
| 7 N1 H22A 2.643 | 28 H19 B1 3.181 |
| 8 C7 H9C 2.822 | 29 H19 F3 2.600 |
| 9 H7A C5 2.651 | 30 C18 B1 3.434 |
| 10 H7A H5A 2.286 | 31 H18 B1 2.877 |
| 11 H7A C9 2.674 | 32 H18 F2 2.622 |
| 12 H7A H9C 2.171 | 33 H18 F4 2.543 |
| 13 C18 H22C 2.804 | 34 H5B F1 2.351 |
| 14 H18 C22 2.721 | 35 H3 B1 3.053 |
| 15 H18 H22C 2.232 | 36 H3 F4 2.597 |
| 16 H9C H19 2.277 | 37 C15 B1 3.606 |
| 17 H10 F4 2.555 | 38 C15 F4 3.132 |
| 18 H12B F1 2.493 | 39 H15 B1 2.846 |
| 19 H20 F1 2.652 | 40 H15 F3 2.568 |
| 20 C7 B1 3.463 | 41 H15 F4 2.399 |
| 21 C7 F2 3.088 | 42 H13B F3 2.422 |

**Table S3:** Percentage cell viability of various human cancer cell lines following 48 h treatment with Ru(II) complexes (**RuL1-RuL4**) compared to cisplatin (CDDP)

| Cell Line | Untreated | Vehicle | RuL1 (C7) |  | RuL2 (C1) | RuL3 (C6) |  | RuL4 (C2) | CDDP |
| --- | --- | --- | --- | --- | --- | --- | --- | --- | --- |
| MCF-7 | 100.1 ± 1.7 | 98.6 ± 1.9 | 91.6 ± 3.7 |  | 93.7 ± 2.8 | 96.8 ± 3.9 |  | 100.4 ± 3.2 | 44.5 ± 4.3 |
| T-47D | 99.9 ± 1.8 | 98.8 ± 2.3 | 94.1 ± 3.4 |  | 95.7 ± 3.1 | 100.2 ± 3.8 |  | 102.3 ± 3.0 | 54.6 ± 4.1 |
| MDA-MB-231 | 100.5 ± 1.9 | 100.1 ± 2.7 | 96.3 ± 3.8 |  | 95.3 ± 3.2 | 97.1 ± 3.9 |  | 101.2 ± 3.5 | 69.8 ± 4.6 |
| Caski | 100.2 ± 1.8 | 98.3 ± 2.5 | 92.9 ± 3.2 |  | 95.4 ± 2.7 | 94.7 ± 3.1 |  | 90.8 ± 3.9 | 24.7 ± 3.4 |
| HeLa | 100.0 ± 1.9 | 99.6 ± 2.8 | 95.7 ± 3.1 |  | 99.7 ± 2.9 | 98.1 ± 2.8 |  | 100.3 ± 3.1 | 69.5 ± 3.9 |
| CFPAC-1 | 100.1 ± 1.8 | 101.7 ± 2.6 | 99.7 ± 3.8 |  | 109.6 ± 4.7 | 110.4 ± 4.9 |  | 119.8 ± 5.8 | 34.9 ± 3.9 |
| PANC-1 | 100.4 ± 2.0 | 99.9 ± 2.9 | 105.3 ± 4.6 |  | 104.7 ± 4.2 | 114.9 ± 4.8 |  | 124.6 ± 5.7 | 30.8 ± 4.2 |
| RH-30 | 100.3 ± 1.9 | 98.1 ± 2.6 | 85.3 ± 4.8 |  | 87.4 ± 3.8 | 88.5 ± 5.9 |  | 99.2 ± 4.7 | 32.6 ± 4.3 |
| RD | 99.8 ± 2.1 | 97.4 ± 2.9 | 97.9 ± 5.7 |  | 94.8 ± 4.2 | 95.3 ± 4.8 |  | 102.7 ± 4.6 | 46.8 ± 5.1 |
